# Supplementary material for: Single-Cell Transcriptome Profiling Reveals Intratumoral Heterogeneity in Human Chordomas
Source: Research Square preprint supplement (doi:10.21203/rs.3.rs-167938/v1), 2021-02-04
Supplement: Supplementary file 1 [file 279474a523c630dd772b384a.csv]

	p_val	avg_logFC	pct.1	pct.2	p_val_adj	cluster	gene
CTGF	0	0.938419109633617	0.996	0.891	0	0	CTGF
SLC2A1	0	0.778987220724617	0.999	0.929	0	0	SLC2A1
ESYT2	0	0.778658294147678	1	0.949	0	0	ESYT2
EPYC	0	0.76337638114282	0.96	0.853	0	0	EPYC
SHH	0	0.67538838758461	0.978	0.824	0	0	SHH
EFEMP1	0	0.664014094867801	0.999	0.884	0	0	EFEMP1
MRGPRX3	0	0.655134443666451	0.999	0.899	0	0	MRGPRX3
COL2A1	0	0.63569464801351	0.999	0.921	0	0	COL2A1
CXCL1	0	0.626333322734051	0.997	0.93	0	0	CXCL1
THY1	0	0.61589373803479	0.999	0.921	0	0	THY1
SCRG1	0	0.614787548402848	0.983	0.878	0	0	SCRG1
C1QTNF3	0	0.608159974262488	1	0.938	0	0	C1QTNF3
IGFBP2	0	0.602848490831602	0.995	0.887	0	0	IGFBP2
ACAN	0	0.593448905935719	1	0.942	0	0	ACAN
CYR61	0	0.556224209677921	0.997	0.922	0	0	CYR61
HAPLN1	0	0.548697674787481	0.969	0.783	0	0	HAPLN1
KRT13	0	0.54183552527235	0.999	0.956	0	0	KRT13
APOE	0	0.535886271647387	0.991	0.876	0	0	APOE
COL6A3	0	0.533751336140596	0.994	0.847	0	0	COL6A3
CTSL	0	0.518782967000124	0.998	0.923	0	0	CTSL
ANGPTL4	0	0.512719702357146	0.996	0.939	0	0	ANGPTL4
TF	0	0.471592470345172	0.999	0.927	0	0	TF
TRIL	0	0.465700147531264	0.993	0.871	0	0	TRIL
COL5A2	0	0.456129243412525	0.976	0.864	0	0	COL5A2
ITGA3	0	0.454555360221701	0.993	0.877	0	0	ITGA3
KCNQ1OT1	0	0.422918131637287	0.991	0.886	0	0	KCNQ1OT1
CSPG4	0	0.411672029580348	0.98	0.836	0	0	CSPG4
HSPG2	0	0.411203736165963	0.954	0.788	0	0	HSPG2
GALNT3	0	0.405567550838325	0.998	0.889	0	0	GALNT3
PLEKHH2	0	0.393475566383202	0.922	0.744	0	0	PLEKHH2
FMOD	0	0.392990822783572	0.994	0.89	0	0	FMOD
EMP2	0	0.390594926658309	0.996	0.908	0	0	EMP2
C2orf40	0	0.387544991610606	1	0.967	0	0	C2orf40
PON2	0	0.384411238579729	0.989	0.854	0	0	PON2
SNORC	0	0.383313892959231	1	0.956	0	0	SNORC
TGFA	0	0.382035510665996	0.988	0.89	0	0	TGFA
PPP3CA	0	0.375579542180121	0.987	0.895	0	0	PPP3CA
FGL2	0	0.375382216335081	0.984	0.845	0	0	FGL2
COL11A1	0	0.364226643343674	0.985	0.869	0	0	COL11A1
TSPAN13	0	0.362923935962396	0.983	0.868	0	0	TSPAN13
SEMA3A	0	0.361941438702197	0.965	0.859	0	0	SEMA3A
TMEM163	0	0.360304608679631	0.965	0.855	0	0	TMEM163
AKAP12	0	0.353111971459595	0.925	0.889	0	0	AKAP12
MIA	0	0.352942362568197	0.999	0.926	0	0	MIA
NCAM1	0	0.348220868127807	0.973	0.868	0	0	NCAM1
SRPX2	0	0.346996943347323	0.935	0.843	0	0	SRPX2
SERPINH1	0	0.346646577039893	0.98	0.865	0	0	SERPINH1
MEST	0	0.329588000779752	0.935	0.815	0	0	MEST
XYLT1	0	0.319737655144654	0.884	0.7	0	0	XYLT1
LIMCH1	0	0.318050376294473	0.989	0.898	0	0	LIMCH1
FN1	0	0.31396586561678	1	0.994	0	0	FN1
GPR157	0	0.313693640575164	0.933	0.812	0	0	GPR157
CAVIN2	0	0.305553030666164	0.933	0.767	0	0	CAVIN2
TNFRSF12A	0	0.302896882535935	0.967	0.889	0	0	TNFRSF12A
ID2	0	0.296478883806589	0.991	0.901	0	0	ID2
CHST3	0	0.295734927580641	0.899	0.731	0	0	CHST3
COL11A2	0	0.285778343064011	0.938	0.869	0	0	COL11A2
EMP1	0	0.284532914056895	0.959	0.845	0	0	EMP1
ATP13A2	0	0.283309820558765	0.877	0.643	0	0	ATP13A2
CHPF	0	0.275926093916682	0.979	0.799	0	0	CHPF
SCARA5	0	0.274704819501502	0.857	0.637	0	0	SCARA5
RCN3	0	0.274564318494723	0.995	0.925	0	0	RCN3
HOTAIRM1	0	0.272880110306007	0.938	0.832	0	0	HOTAIRM1
KDELR3	0	0.270308088426381	0.997	0.915	0	0	KDELR3
SEZ6L2	0	0.267796714817422	0.941	0.809	0	0	SEZ6L2
FSTL1	0	0.263609455564225	0.975	0.833	0	0	FSTL1
CHI3L2	0	1.12133027202174	0.966	0.799	0	1	CHI3L2
IGFBP3	0	0.903011406702324	0.825	0.573	0	1	IGFBP3
HILPDA	0	0.880532606712776	0.992	0.934	0	1	HILPDA
SERPINE2	0	0.816086051924304	0.988	0.913	0	1	SERPINE2
SPARCL1	0	0.810732696734952	0.997	0.936	0	1	SPARCL1
NDUFA4L2	0	0.789676150311787	0.995	0.929	0	1	NDUFA4L2
GLUL	0	0.700890343284122	0.958	0.779	0	1	GLUL
MT1X	0	0.687140486367397	0.94	0.816	0	1	MT1X
MT2A	0	0.673349396602292	0.996	0.966	0	1	MT2A
SOD2	0	0.658034674736338	0.975	0.863	0	1	SOD2
IGFBP7	0	0.633874573038099	0.987	0.901	0	1	IGFBP7
TREM1	0	0.591089900313827	0.856	0.583	0	1	TREM1
NNMT	0	0.575669817779388	0.649	0.347	0	1	NNMT
ERRFI1	0	0.563128210561769	0.992	0.918	0	1	ERRFI1
S100P	0	0.560024199809662	0.875	0.707	0	1	S100P
NUPR1	0	0.559982121888798	0.982	0.863	0	1	NUPR1
GDF15	0	0.521921522868967	0.905	0.818	0	1	GDF15
RGS1	0	0.463114952117245	0.879	0.686	0	1	RGS1
NAMPT	0	0.410870575146748	0.982	0.919	0	1	NAMPT
RRAD	0	0.379096276875829	0.794	0.591	0	1	RRAD
SCG2	0	0.368233776979865	0.755	0.525	0	1	SCG2
EGLN3	0	0.355834808119003	0.929	0.804	0	1	EGLN3
ARL4C	0	0.355549415491296	0.916	0.781	0	1	ARL4C
ITGA10	0	0.354171990895607	0.802	0.603	0	1	ITGA10
ITGA5	0	0.35217655375535	0.984	0.912	0	1	ITGA5
CCL3	0	0.332082339365105	0.782	0.612	0	1	CCL3
GEM	0	0.327797681594457	0.859	0.644	0	1	GEM
PLAUR	0	0.309589137491119	0.903	0.756	0	1	PLAUR
CXCL2	0	0.303834202959872	0.724	0.453	0	1	CXCL2
SLC2A3	0	0.289647640492225	0.904	0.795	0	1	SLC2A3
FGF2	0	0.289263294018589	0.92	0.753	0	1	FGF2
CXCR4	0	0.276275515346021	0.806	0.594	0	1	CXCR4
SLAMF9	0	0.272974411005737	0.849	0.701	0	1	SLAMF9
PCSK2	8.08662933772333e-299	0.474389551016232	0.826	0.672	1.61732586754467e-295	1	PCSK2
MT1G	4.32335955674569e-294	0.658916023105804	0.928	0.846	8.64671911349137e-291	1	MT1G
PDK4	2.30222508856323e-291	0.351835451450123	0.84	0.577	4.60445017712647e-288	1	PDK4
ZFP36L2	1.53420396470007e-274	0.4574353370774	0.956	0.851	3.06840792940015e-271	1	ZFP36L2
GPRC5A	1.39428206745312e-273	0.28739556842983	0.82	0.692	2.78856413490625e-270	1	GPRC5A
PLTP	1.94711382367962e-265	0.254290944964503	0.821	0.686	3.89422764735925e-262	1	PLTP
ID3	3.82631658206158e-265	0.400694901178362	0.881	0.775	7.65263316412316e-262	1	ID3
TSC22D1	2.43718232510108e-251	0.333009134808633	0.849	0.673	4.87436465020217e-248	1	TSC22D1
ADM	3.06680150892131e-249	0.376815261527929	0.985	0.926	6.13360301784263e-246	1	ADM
SPP1	3.02414265872226e-243	1.60059289377805	0.92	0.836	6.04828531744453e-240	1	SPP1
SERPINE1	1.31180724176455e-228	0.313521044969274	0.747	0.594	2.62361448352909e-225	1	SERPINE1
SLC26A2	1.46433078399688e-223	0.25924348163486	0.825	0.657	2.92866156799377e-220	1	SLC26A2
BTG2	1.01575071176597e-220	0.311784656654798	0.841	0.655	2.03150142353193e-217	1	BTG2
TGM2	2.45884018469661e-218	0.330018147722311	0.623	0.401	4.91768036939323e-215	1	TGM2
TIMP1	9.76032130448558e-203	0.346701474751829	0.989	0.937	1.95206426089712e-199	1	TIMP1
SOCS3	9.27668319470551e-191	0.296657516519386	0.743	0.561	1.8553366389411e-187	1	SOCS3
KLF2	1.79457547130367e-189	0.377606685203275	0.914	0.779	3.58915094260734e-186	1	KLF2
ATF3	1.70238078031402e-187	0.33548170261468	0.887	0.779	3.40476156062803e-184	1	ATF3
TM4SF1	2.07385008563025e-185	0.278248709862606	0.991	0.931	4.1477001712605e-182	1	TM4SF1
PLIN2	8.14156867486738e-180	0.327051655697853	0.937	0.856	1.62831373497348e-176	1	PLIN2
VEGFA	6.21255653776869e-168	0.260635914116848	0.941	0.843	1.24251130755374e-164	1	VEGFA
AEBP1	2.58607548695833e-161	0.264360075557804	0.997	0.927	5.17215097391667e-158	1	AEBP1
MT1A	1.0150227229102e-158	0.294588416695917	0.784	0.663	2.0300454458204e-155	1	MT1A
TXNIP	9.21838316938773e-151	0.27062707029344	0.95	0.85	1.84367663387755e-147	1	TXNIP
KLF4	2.49194296848935e-124	0.259390245121672	0.881	0.812	4.9838859369787e-121	1	KLF4
MT1E	2.91980073842432e-117	0.253727796658817	0.993	0.956	5.83960147684864e-114	1	MT1E
C11orf96	2.33643305255197e-36	0.315072432519669	0.872	0.807	4.67286610510394e-33	1	C11orf96
KRT19	1.22308314508405e-175	0.51078823575248	0.983	1	2.44616629016811e-172	2	KRT19
FTL	6.99654129063101e-137	0.459187805623406	0.985	0.996	1.3993082581262e-133	2	FTL
S100A10	8.91021969390575e-122	0.393710583839345	0.948	0.995	1.78204393878115e-118	2	S100A10
CD74	2.13727432270846e-121	0.378683615680886	0.502	0.781	4.27454864541692e-118	2	CD74
MZB1	5.6334486194503e-109	0.692309684821882	0.4	0.199	1.12668972389006e-105	2	MZB1
GAPDH	1.09663493725616e-102	0.384312048638877	0.966	0.994	2.19326987451232e-99	2	GAPDH
KRT18	3.69137733240044e-88	0.546906089607104	0.915	0.985	7.38275466480088e-85	2	KRT18
HBA2	6.86903304005514e-86	1.83210207763404	0.622	0.558	1.37380660801103e-82	2	HBA2
HBA1	8.79030349850545e-67	1.15586832718466	0.575	0.47	1.75806069970109e-63	2	HBA1
IL1B	9.618178382511e-61	0.291619545395515	0.39	0.539	1.9236356765022e-57	2	IL1B
GPR183	5.64847555358736e-53	0.258037421850885	0.378	0.491	1.12969511071747e-49	2	GPR183
IGHA1	4.25815997069658e-35	2.32085853985567	0.476	0.186	8.51631994139316e-32	2	IGHA1
JCHAIN	1.57736819374649e-31	0.573383734325588	0.391	0.482	3.15473638749299e-28	2	JCHAIN
FNDC4	6.41164884887781e-26	0.274327707147429	0.825	0.918	1.28232976977556e-22	2	FNDC4
RAB38	7.26595250586553e-23	0.353958757205272	0.65	0.848	1.45319050117311e-19	2	RAB38
HBB	2.08853265367503e-22	2.12190757218378	0.456	0.568	4.17706530735006e-19	2	HBB
CBR1	2.64479272013773e-18	0.313092967457006	0.656	0.86	5.28958544027546e-15	2	CBR1
TUBB2A	2.83080191024216e-18	0.30444831269211	0.85	0.921	5.66160382048433e-15	2	TUBB2A
PYCR1	2.81450724100166e-16	0.318715085862317	0.846	0.925	5.62901448200333e-13	2	PYCR1
AKR1B10	5.56816698776086e-13	0.584977385802906	0.736	0.792	1.11363339755217e-09	2	AKR1B10
IGHG1	1.0204623579447e-12	2.41147574361676	0.312	0.105	2.04092471588939e-09	2	IGHG1
KRT8	2.78103382470626e-12	0.270969219298179	0.908	0.99	5.56206764941253e-09	2	KRT8
IGKC	2.86558209353679e-12	4.33103307993365	0.383	0.463	5.73116418707358e-09	2	IGKC
HLA-DRA	1.36050096209844e-11	0.319380599459754	0.421	0.48	2.72100192419688e-08	2	HLA-DRA
APOD	1.30604977662921e-10	0.410604726789445	0.37	0.364	2.61209955325841e-07	2	APOD
KRT131	2.64777714603522e-10	0.349176257413082	0.957	0.978	5.29555429207045e-07	2	KRT13
ADIRF	4.16599355023665e-10	0.281238197706958	0.886	0.976	8.33198710047329e-07	2	ADIRF
CCL4L2	2.06178267091682e-08	0.288590370845758	0.542	0.517	4.12356534183363e-05	2	CCL4L2
NAGK	2.33010314291399e-07	0.303436454200908	0.656	0.895	0.000466020628582799	2	NAGK
TUBA1B	5.7631448088367e-07	0.370045641672188	0.938	0.982	0.00115262896176734	2	TUBA1B
IGHG2	1.45873808500036e-06	1.71045038677527	0.298	0.098	0.00291747617000073	2	IGHG2
MT1E1	1.68258332662037e-06	0.329007873412809	0.902	0.976	0.00336516665324075	2	MT1E
UCHL1	3.89469733944017e-06	0.297156140806736	0.772	0.781	0.00778939467888034	2	UCHL1
SNCG	4.26101997961626e-05	0.430831859766069	0.867	0.96	0.0852203995923252	2	SNCG
IGLC2	0.000729270766951816	4.8502541281406	0.415	0.328	1	2	IGLC2
IGHG4	0.000877201240736726	1.67846842370559	0.367	0.264	1	2	IGHG4
IGLC3	0.00507521847153059	3.85030376470656	0.388	0.427	1	2	IGLC3
S100B	0.0081576795161387	0.513964551277747	0.88	0.958	1	2	S100B
CA3	0	2.62961420906625	0.939	0.463	0	3	CA3
LGALS3	0	2.05128394194492	0.999	0.969	0	3	LGALS3
LYST	0	1.70286296045326	0.92	0.679	0	3	LYST
NPTX1	0	1.35119162435494	0.803	0.452	0	3	NPTX1
CD24	0	1.14943272900369	0.945	0.885	0	3	CD24
RAB3B	0	1.14765671318165	0.938	0.903	0	3	RAB3B
PCDH7	0	0.43342698938541	0.812	0.632	0	3	PCDH7
RGCC	6.58674101019195e-246	1.27740367477208	0.822	0.511	1.31734820203839e-242	3	RGCC
C3orf49	3.73331672171778e-239	0.998425154977488	0.754	0.403	7.46663344343557e-236	3	C3orf49
CPE	2.90348419133465e-193	0.256769260064942	0.705	0.395	5.8069683826693e-190	3	CPE
ANK3	3.25365287514775e-191	0.794837173474216	0.721	0.39	6.50730575029549e-188	3	ANK3
KRT81	1.18015723784868e-155	0.507482434414406	0.968	0.979	2.36031447569736e-152	3	KRT8
CHRM2	9.93451345286981e-153	0.508526972114574	0.807	0.663	1.98690269057396e-149	3	CHRM2
ENPP1	3.62339091216894e-151	0.835688784986633	0.782	0.611	7.24678182433789e-148	3	ENPP1
ID4	1.40285726334034e-147	0.851494175256136	0.763	0.516	2.80571452668067e-144	3	ID4
DST	8.58117733440285e-134	0.726654219112537	0.884	0.876	1.71623546688057e-130	3	DST
TCEAL2	3.52497671569785e-129	0.27874697281411	0.779	0.65	7.0499534313957e-126	3	TCEAL2
LINC00525	8.98332020887351e-125	0.456834041280661	0.735	0.547	1.7966640417747e-121	3	LINC00525
FGL21	2.37587006846625e-122	0.647853054886607	0.899	0.906	4.7517401369325e-119	3	FGL2
CLU	6.78011660189633e-118	0.443917344397111	0.933	0.95	1.35602332037927e-114	3	CLU
ABI3BP	2.14376093055757e-112	0.673229380311091	0.697	0.47	4.28752186111514e-109	3	ABI3BP
GJA1	4.86929138874884e-112	0.74931425422389	0.853	0.828	9.73858277749769e-109	3	GJA1
HTRA1	1.1775872434243e-100	0.764382648551912	0.783	0.659	2.3551744868486e-97	3	HTRA1
WISP2	9.94187108976099e-99	0.658347712140331	0.645	0.37	1.9883742179522e-95	3	WISP2
C3	3.78630475177825e-93	0.527235174987408	0.766	0.56	7.5726095035565e-90	3	C3
PRUNE2	2.03672708879555e-89	0.349915214228727	0.584	0.308	4.07345417759111e-86	3	PRUNE2
SDC2	2.58742008408772e-77	0.616336969782902	0.798	0.767	5.17484016817545e-74	3	SDC2
TAGLN	3.69039396011762e-67	0.551028833030731	0.838	0.787	7.38078792023525e-64	3	TAGLN
PSAP	4.68320798130407e-65	0.490270803656259	0.833	0.841	9.36641596260814e-62	3	PSAP
DSP	6.97659892141172e-65	0.444546611376906	0.577	0.331	1.39531978428234e-61	3	DSP
ARMC4	3.33587591981214e-61	0.292779529502202	0.612	0.503	6.67175183962429e-58	3	ARMC4
AKR1B101	6.09010208982425e-60	0.34564423781799	0.811	0.781	1.21802041796485e-56	3	AKR1B10
HOPX	5.44294595650978e-54	0.359147048870667	0.93	0.97	1.08858919130196e-50	3	HOPX
DKK3	3.42654831575408e-36	0.40089019480251	0.581	0.398	6.85309663150816e-33	3	DKK3
GPM6B	9.44527079193593e-34	0.426628092807189	0.514	0.325	1.88905415838719e-30	3	GPM6B
BNIP3	1.50249007090695e-28	0.592993410195667	0.855	0.856	3.00498014181389e-25	3	BNIP3
KCNMB4	1.67232445688616e-28	0.343013047022824	0.79	0.751	3.34464891377232e-25	3	KCNMB4
CKB	2.15073517465525e-27	0.374987618306571	0.511	0.335	4.30147034931049e-24	3	CKB
MUC1	1.83417769716482e-25	0.36812391758384	0.565	0.437	3.66835539432963e-22	3	MUC1
DSG2	2.56239234819156e-25	0.352461847917455	0.75	0.741	5.12478469638313e-22	3	DSG2
TP53I3	1.04988965408262e-24	0.451967199711417	0.586	0.488	2.09977930816523e-21	3	TP53I3
RETREG1	2.00232028064672e-24	0.315349978519019	0.562	0.423	4.00464056129344e-21	3	RETREG1
NBL1	4.62049768872537e-24	0.384921302465087	0.667	0.624	9.24099537745073e-21	3	NBL1
PCDH9	1.02593336716716e-23	0.329335795745514	0.755	0.718	2.05186673433432e-20	3	PCDH9
RASD1	1.26168021423338e-23	0.379498119945631	0.569	0.427	2.52336042846676e-20	3	RASD1
LCN1	1.47122903363977e-21	0.335564136564214	0.454	0.237	2.94245806727954e-18	3	LCN1
PPL	3.48665818133923e-19	0.254303694885096	0.642	0.58	6.97331636267846e-16	3	PPL
MTUS1	5.83326535738153e-18	0.324994781753533	0.622	0.527	1.16665307147631e-14	3	MTUS1
ETV1	8.51865981953034e-17	0.293363833501973	0.727	0.732	1.70373196390607e-13	3	ETV1
SNCG1	5.8239438489059e-16	0.282503017374771	0.891	0.953	1.16478876978118e-12	3	SNCG
UGP2	1.75766765048901e-15	0.276126638863404	0.864	0.932	3.51533530097803e-12	3	UGP2
GPM6A	8.247577197373e-15	0.3344946931977	0.81	0.847	1.6495154394746e-11	3	GPM6A
MGLL	1.36568178662579e-14	0.405450797419586	0.618	0.566	2.73136357325158e-11	3	MGLL
SUSD5	3.38266543915933e-14	0.257443688303796	0.627	0.564	6.76533087831865e-11	3	SUSD5
CERS6	8.76748927218883e-13	0.32612011944308	0.742	0.767	1.75349785443777e-09	3	CERS6
RAPGEF5	4.3513674691236e-12	0.322574268812716	0.816	0.867	8.70273493824719e-09	3	RAPGEF5
AL353751.1	3.75070971185374e-11	0.271794591454884	0.593	0.551	7.50141942370749e-08	3	AL353751.1
SEMA3C	3.14633720577138e-10	0.370322783667626	0.566	0.495	6.29267441154277e-07	3	SEMA3C
MOXD1	3.19489885886069e-09	0.295519972639422	0.527	0.454	6.38979771772137e-06	3	MOXD1
TNFRSF11B	3.75382483073796e-09	0.383029430654422	0.704	0.733	7.50764966147591e-06	3	TNFRSF11B
P3H2	6.70654081148517e-09	0.289292113240875	0.491	0.379	1.34130816229703e-05	3	P3H2
CA12	6.31308828044026e-07	0.264631335598843	0.709	0.727	0.00126261765608805	3	CA12
CAPG	1.22295907714035e-06	0.280346236990817	0.752	0.774	0.0024459181542807	3	CAPG
PAPSS2	1.70141102161559e-06	0.305238596760371	0.728	0.777	0.00340282204323117	3	PAPSS2
CXCL14	1.13734268382821e-05	0.376762668966251	0.312	0.259	0.0227468536765643	3	CXCL14
CBR11	1.9195588449507e-05	0.361717027522586	0.75	0.84	0.0383911768990141	3	CBR1
ASAP2	2.31197949157978e-05	0.284889025067671	0.698	0.739	0.0462395898315955	3	ASAP2
CCND1	0.000537798498891851	0.317490773260729	0.841	0.904	1	3	CCND1
MAD2L1	4.63703377473322e-258	1.0780060150334	0.909	0.771	9.27406754946645e-255	4	MAD2L1
TYMS	8.15346237505013e-239	0.952833656993098	0.869	0.448	1.63069247501003e-235	4	TYMS
PCLAF	5.62307148337315e-234	1.28945377481222	0.848	0.598	1.12461429667463e-230	4	PCLAF
STMN1	1.49580610690416e-231	1.42984365071377	0.86	0.577	2.99161221380832e-228	4	STMN1
H2AFZ	2.10841427789184e-226	1.33796870595244	0.977	0.912	4.21682855578367e-223	4	H2AFZ
TUBA1B1	1.83716161706293e-210	1.10061148259828	0.997	0.975	3.67432323412587e-207	4	TUBA1B
CKS1B	7.13676154856611e-201	1.01911579650332	0.906	0.764	1.42735230971322e-197	4	CKS1B
CENPU	1.31080669012305e-185	0.710842197961903	0.755	0.456	2.6216133802461e-182	4	CENPU
UBE2C	9.34421087288328e-185	1.3488930529709	0.769	0.529	1.86884217457666e-181	4	UBE2C
CENPM	4.49827474537357e-181	0.622180012958979	0.817	0.689	8.99654949074715e-178	4	CENPM
TK1	1.06802753182117e-178	0.809837447564412	0.786	0.61	2.13605506364234e-175	4	TK1
NMU	2.32301554160026e-176	0.974482526047108	0.803	0.534	4.64603108320052e-173	4	NMU
PTTG1	2.98789884299233e-168	1.31070762883093	0.88	0.759	5.97579768598465e-165	4	PTTG1
NUSAP1	4.02974386228182e-165	0.852598603650258	0.649	0.298	8.05948772456364e-162	4	NUSAP1
ZWINT	1.1875984452586e-154	0.589890841671722	0.752	0.586	2.3751968905172e-151	4	ZWINT
DTYMK	9.81070430395139e-153	0.760287305742581	0.865	0.704	1.96214086079028e-149	4	DTYMK
UBE2T	6.01739206507635e-151	0.757298768628095	0.694	0.378	1.20347841301527e-147	4	UBE2T
GGH	1.63592914678654e-144	0.604238395398691	0.789	0.584	3.27185829357308e-141	4	GGH
PHGDH	1.13435799156107e-137	0.508315991083222	0.886	0.813	2.26871598312215e-134	4	PHGDH
UBE2S	6.35767347361489e-121	1.25218968913089	0.965	0.893	1.27153469472298e-117	4	UBE2S
GAPDH1	1.19864729249388e-120	0.541749832611782	0.998	0.99	2.39729458498777e-117	4	GAPDH
BIRC5	8.25516683890419e-120	1.0478771011477	0.698	0.569	1.65103336778084e-116	4	BIRC5
ASF1B	1.13858212682841e-119	0.250598371874378	0.545	0.297	2.27716425365682e-116	4	ASF1B
ORC6	8.20341132073448e-119	0.360453763341933	0.674	0.456	1.6406822641469e-115	4	ORC6
RAD51AP1	6.19554286756916e-117	0.328766589377973	0.623	0.43	1.23910857351383e-113	4	RAD51AP1
GINS2	9.50456659402519e-116	0.562082326729794	0.715	0.551	1.90091331880504e-112	4	GINS2
PTN	9.67693009904975e-116	0.64006156504789	0.875	0.824	1.93538601980995e-112	4	PTN
FABP5	3.56266560454179e-110	0.539870449952806	0.958	0.941	7.12533120908358e-107	4	FABP5
FANCI	3.65751405517102e-107	0.256225758260271	0.603	0.392	7.31502811034205e-104	4	FANCI
DTL	9.75278998454481e-107	0.305560746065129	0.551	0.315	1.95055799690896e-103	4	DTL
SHCBP1	2.44410894699491e-98	0.478147193130853	0.648	0.532	4.88821789398982e-95	4	SHCBP1
TPX2	7.58137205534671e-98	0.602849348774523	0.642	0.49	1.51627441106934e-94	4	TPX2
PBK	2.54662236270614e-95	0.490077143817763	0.578	0.322	5.09324472541227e-92	4	PBK
CDKN3	5.80565708591671e-92	0.562112593488068	0.538	0.322	1.16113141718334e-88	4	CDKN3
CKS2	6.43916700786465e-91	0.685781983883309	0.745	0.551	1.28783340157293e-87	4	CKS2
CENPK	1.54064378448331e-88	0.294473890192576	0.591	0.431	3.08128756896661e-85	4	CENPK
IGFBP21	6.24847999021959e-88	0.592685247075706	0.965	0.933	1.24969599804392e-84	4	IGFBP2
KIF20B	1.72589262739024e-85	0.263467991846501	0.526	0.332	3.45178525478048e-82	4	KIF20B
PRC1	3.86725052222712e-85	0.487447532017307	0.498	0.251	7.73450104445425e-82	4	PRC1
CDK1	6.19935734989892e-85	0.482375234857938	0.514	0.328	1.23987146997978e-81	4	CDK1
CCNB2	5.73188501325455e-84	0.435228930637672	0.455	0.208	1.14637700265091e-80	4	CCNB2
MCM4	3.88152869680309e-79	0.332173098417655	0.597	0.416	7.76305739360619e-76	4	MCM4
CENPW	3.11678707010927e-78	0.32545884233159	0.478	0.247	6.23357414021855e-75	4	CENPW
TOP2A	3.01671856827837e-75	1.0008370186327	0.565	0.413	6.03343713655674e-72	4	TOP2A
KRT132	3.38127492378134e-75	0.664694746453851	0.992	0.974	6.76254984756268e-72	4	KRT13
CENPF	2.54199934865826e-73	0.873595950934345	0.489	0.284	5.08399869731653e-70	4	CENPF
PYCR11	1.50302441464063e-72	0.346009711999017	0.912	0.914	3.00604882928126e-69	4	PYCR1
NEK2	2.31012413016615e-70	0.294285372243365	0.468	0.325	4.6202482603323e-67	4	NEK2
DEPDC1	2.49148347847233e-70	0.294883433398143	0.523	0.409	4.98296695694466e-67	4	DEPDC1
ASPM	4.60203279479743e-68	0.310178915983291	0.412	0.228	9.20406558959486e-65	4	ASPM
PCNA	2.1301429597335e-67	0.417785073336028	0.663	0.487	4.260285919467e-64	4	PCNA
PIMREG	6.09315239279018e-67	0.3383831664954	0.495	0.354	1.21863047855804e-63	4	PIMREG
CDC45	7.40889310315608e-67	0.285022574688668	0.614	0.584	1.48177862063122e-63	4	CDC45
TACC3	6.51292360392372e-66	0.374790819585211	0.663	0.632	1.30258472078474e-62	4	TACC3
CDT1	4.93250647994256e-65	0.258932220710393	0.532	0.439	9.86501295988512e-62	4	CDT1
KIF23	8.13861236198751e-65	0.275482348150901	0.445	0.249	1.6277224723975e-61	4	KIF23
C12orf75	8.70716095577835e-64	0.447942450291561	0.938	0.91	1.74143219115567e-60	4	C12orf75
DHFR	9.21955660766062e-56	0.265244710471961	0.586	0.474	1.84391132153212e-52	4	DHFR
FOXM1	7.48413894854643e-55	0.303895542633488	0.525	0.454	1.49682778970929e-51	4	FOXM1
ANLN	1.42245485768737e-54	0.490281386479369	0.494	0.366	2.84490971537474e-51	4	ANLN
MEST1	2.76805662841191e-53	0.382654492339686	0.866	0.867	5.53611325682383e-50	4	MEST
APOE1	2.87266364331096e-53	0.422482161623442	0.951	0.925	5.74532728662192e-50	4	APOE
HAPLN11	5.94992783141361e-52	0.420828535488769	0.903	0.862	1.18998556628272e-48	4	HAPLN1
SLC2A11	6.79101999783798e-50	0.489666388503952	0.935	0.96	1.3582039995676e-46	4	SLC2A1
CDKN2A	1.45630074467515e-49	0.273531274306483	0.917	0.925	2.9126014893503e-46	4	CDKN2A
HMGB2	2.9812633545325e-49	0.741701226064407	0.917	0.925	5.96252670906501e-46	4	HMGB2
TGFA1	4.95057794255343e-49	0.398677768568046	0.925	0.933	9.90115588510685e-46	4	TGFA
ANXA3	1.34620630262727e-48	0.354198386981925	0.783	0.789	2.69241260525453e-45	4	ANXA3
THY11	3.83329721611733e-48	0.354103973058452	0.96	0.954	7.66659443223466e-45	4	THY1
TNFRSF12A1	7.00011659268192e-48	0.508189268997208	0.926	0.923	1.40002331853638e-44	4	TNFRSF12A
CENPA	3.54939779919851e-47	0.251973888453315	0.411	0.32	7.09879559839703e-44	4	CENPA
CCNB1	2.53856113409784e-46	0.529947668329144	0.46	0.364	5.07712226819567e-43	4	CCNB1
ARHGAP11A	2.79962823241935e-46	0.252836965014817	0.465	0.371	5.5992564648387e-43	4	ARHGAP11A
HJURP	1.18296579796835e-45	0.327031078510884	0.469	0.408	2.36593159593671e-42	4	HJURP
FBLN1	2.81518342530189e-43	0.272534503018082	0.685	0.615	5.63036685060378e-40	4	FBLN1
HIST1H4C	4.4284455317543e-43	0.589935705708564	0.694	0.552	8.85689106350859e-40	4	HIST1H4C
CDCA3	1.11890457199085e-42	0.459278766113102	0.483	0.434	2.23780914398169e-39	4	CDCA3
HMMR	1.83644054026249e-42	0.265778041077157	0.425	0.349	3.67288108052498e-39	4	HMMR
CDC20	3.06879676773256e-42	0.44330291047734	0.443	0.36	6.13759353546512e-39	4	CDC20
PLAC8	1.47833799735523e-40	0.294683951882608	0.9	0.875	2.95667599471046e-37	4	PLAC8
ARL6IP1	4.36805906690791e-40	0.796447132958635	0.903	0.818	8.73611813381582e-37	4	ARL6IP1
EFEMP11	2.89700779627621e-39	0.371677892709702	0.928	0.934	5.79401559255243e-36	4	EFEMP1
KPNA2	7.56486253169062e-38	0.35883058190399	0.486	0.368	1.51297250633812e-34	4	KPNA2
TROAP	9.2357226168958e-38	0.356883357390897	0.505	0.489	1.84714452337916e-34	4	TROAP
TSPAN131	3.22859402767597e-36	0.277272896506281	0.903	0.918	6.45718805535193e-33	4	TSPAN13
COL5A21	7.52345014430848e-33	0.300348410809471	0.905	0.912	1.5046900288617e-29	4	COL5A2
RCN31	7.66230472485541e-32	0.290400721277428	0.94	0.956	1.53246094497108e-28	4	RCN3
COL2A11	1.04062200779025e-31	0.438289714210776	0.935	0.956	2.0812440155805e-28	4	COL2A1
HBA21	5.0344411402404e-30	0.5276775336965	0.28	0.579	1.00688822804808e-26	4	HBA2
RRM2	7.59150634700158e-30	0.59090413147329	0.583	0.676	1.51830126940032e-26	4	RRM2
MRGPRX31	2.08484031879886e-28	0.305158633470033	0.922	0.943	4.16968063759771e-25	4	MRGPRX3
CXCL8	8.19828936729636e-27	0.522143807359246	0.863	0.882	1.63965787345927e-23	4	CXCL8
HBB1	1.48659927193964e-26	1.07483186593331	0.309	0.563	2.97319854387927e-23	4	HBB
SERPINH11	2.39492365930246e-26	0.26651651487034	0.9	0.915	4.78984731860492e-23	4	SERPINH1
AURKB	6.35509525446438e-26	0.272060936117708	0.475	0.484	1.27101905089288e-22	4	AURKB
ANGPTL41	1.90926985674197e-25	0.421328062713648	0.952	0.964	3.81853971348395e-22	4	ANGPTL4
UCHL11	3.30734171837101e-25	0.30170199220543	0.74	0.782	6.61468343674202e-22	4	UCHL1
TMEM1631	3.89724660573362e-23	0.255323282846402	0.9	0.902	7.79449321146725e-20	4	TMEM163
AL353751.11	2.25065338851756e-21	0.306923040891157	0.622	0.552	4.50130677703512e-18	4	AL353751.1
AURKA	1.22800293685512e-20	0.27055597540143	0.355	0.339	2.45600587371023e-17	4	AURKA
KIF4A	5.006657489654e-20	0.308507597179004	0.452	0.472	1.0013314979308e-16	4	KIF4A
TF1	3.93870193285535e-18	0.338328103541661	0.954	0.959	7.8774038657107e-15	4	TF
TUBB2A1	7.79899678467039e-16	0.293753866895714	0.935	0.91	1.55979935693408e-12	4	TUBB2A
GTSE1	2.12247899049039e-15	0.288784910334456	0.489	0.536	4.24495798098078e-12	4	GTSE1
TM4SF11	3.3075976046843e-14	0.290704475673464	0.94	0.948	6.61519520936861e-11	4	TM4SF1
AKAP121	2.97134025028308e-08	0.417742799776649	0.849	0.907	5.94268050056616e-05	4	AKAP12
HBA11	4.79957879769566e-08	0.720656675962687	0.282	0.493	9.59915759539132e-05	4	HBA1
HSPA1A	2.38493547963703e-61	1.67937690373061	0.917	0.907	4.76987095927407e-58	5	HSPA1A
HSPA1B	1.43395798660486e-48	1.0987501847715	0.862	0.835	2.86791597320972e-45	5	HSPA1B
GEM1	1.77379903999616e-46	0.377160972357611	0.849	0.699	3.54759807999231e-43	5	GEM
HSPH1	5.42116944633549e-40	0.963961879227335	0.828	0.799	1.0842338892671e-36	5	HSPH1
ATF31	1.30624847590118e-39	0.850299182468178	0.904	0.806	2.61249695180236e-36	5	ATF3
IER5	8.98815874185005e-37	0.96265159875886	0.803	0.724	1.79763174837001e-33	5	IER5
PTGS2	5.52857120051397e-36	0.419828246016085	0.901	0.807	1.10571424010279e-32	5	PTGS2
NFKBIZ	8.41448124032711e-36	0.820506367922914	0.778	0.678	1.68289624806542e-32	5	NFKBIZ
CXCL3	1.01109445779178e-35	0.576663814685045	0.739	0.519	2.02218891558357e-32	5	CXCL3
DNAJA4	3.35588561255019e-32	0.555706604255721	0.771	0.571	6.71177122510037e-29	5	DNAJA4
DNAJB1	4.69349419204719e-32	0.713790149682969	0.892	0.894	9.38698838409438e-29	5	DNAJB1
AC020916.1	5.69921821262094e-32	0.965698086767112	0.908	0.883	1.13984364252419e-28	5	AC020916.1
IL1RL1	3.90497372647294e-31	0.255185536840268	0.846	0.665	7.80994745294589e-28	5	IL1RL1
RGS11	1.36208019297989e-29	0.739031232697768	0.833	0.736	2.72416038595979e-26	5	RGS1
RHOB	2.17820571154651e-27	0.653329888111481	0.867	0.826	4.35641142309301e-24	5	RHOB
TYROBP	5.03046438574908e-27	0.735427669859663	0.672	0.496	1.00609287714982e-23	5	TYROBP
CXCR41	5.92257049945366e-27	0.581561156835251	0.741	0.65	1.18451409989073e-23	5	CXCR4
KLF41	6.97747394743161e-27	0.532097265136361	0.849	0.83	1.39549478948632e-23	5	KLF4
ADAMTS1	1.08551299530166e-26	0.434627881127764	0.839	0.707	2.17102599060332e-23	5	ADAMTS1
KCNQ1OT11	1.78972731515245e-25	1.11374146180768	0.956	0.931	3.57945463030489e-22	5	KCNQ1OT1
EGR1	3.09715610264385e-24	0.84909470289838	0.75	0.684	6.1943122052877e-21	5	EGR1
IER2	2.85936541753654e-23	0.654274386324529	0.849	0.89	5.71873083507308e-20	5	IER2
CCL4	4.72677522427252e-23	1.42423697787544	0.695	0.536	9.45355044854504e-20	5	CCL4
GPRC5A1	1.15130768075636e-22	0.2511390032263	0.833	0.724	2.30261536151271e-19	5	GPRC5A
KLF6	3.02650128482756e-22	0.722968881364228	0.787	0.821	6.05300256965512e-19	5	KLF6
NR4A2	4.12519188449213e-22	0.679106889534047	0.743	0.697	8.25038376898425e-19	5	NR4A2
FCER1G	9.71435958673408e-20	0.528071607444307	0.651	0.452	1.94287191734682e-16	5	FCER1G
KLF21	4.86484554415415e-19	0.678183925568343	0.869	0.814	9.7296910883083e-16	5	KLF2
GADD45B	5.66888700252817e-19	0.645532617704015	0.823	0.834	1.13377740050563e-15	5	GADD45B
PMAIP1	9.2225366931463e-19	0.590607424138097	0.773	0.649	1.84450733862926e-15	5	PMAIP1
AREG	1.64463653266622e-18	0.623070639523068	0.72	0.617	3.28927306533244e-15	5	AREG
BTG21	5.89124050457092e-18	0.524402929951136	0.727	0.706	1.17824810091418e-14	5	BTG2
LST1	1.62951814166391e-17	0.257040770905438	0.606	0.454	3.25903628332783e-14	5	LST1
AC103591.3	2.90848369499756e-17	0.269268280650823	0.789	0.723	5.81696738999512e-14	5	AC103591.3
TNFAIP3	3.12289017100526e-17	0.73479798439616	0.679	0.582	6.24578034201053e-14	5	TNFAIP3
IER3	3.76604518329641e-17	0.787797554521008	0.782	0.758	7.53209036659281e-14	5	IER3
A2M	7.26690513178624e-17	0.442177274659609	0.55	0.272	1.45338102635725e-13	5	A2M
NFKBIA	6.91335870490769e-16	0.626486205151982	0.83	0.881	1.38267174098154e-12	5	NFKBIA
TFPI2	1.6265316329758e-15	0.290604259758984	0.954	0.93	3.25306326595161e-12	5	TFPI2
HSPA6	2.15719609267778e-15	0.611098928863809	0.757	0.684	4.31439218535557e-12	5	HSPA6
LDLR	2.431523309268e-15	0.415810542081861	0.814	0.658	4.86304661853599e-12	5	LDLR
DUSP2	3.39372397186965e-15	0.604577494927448	0.576	0.376	6.7874479437393e-12	5	DUSP2
CD37	4.00500940999404e-15	0.294184485518084	0.569	0.415	8.01001881998809e-12	5	CD37
ANKRD37	1.69491832919654e-14	0.507726705413194	0.865	0.835	3.38983665839309e-11	5	ANKRD37
NT5DC3	5.01828854481919e-14	0.571906053461361	0.927	0.864	1.00365770896384e-10	5	NT5DC3
ID41	5.53482372567815e-14	0.254545202778613	0.736	0.532	1.10696474513563e-10	5	ID4
CCL31	1.25229894747077e-13	1.31126645159504	0.718	0.657	2.50459789494154e-10	5	CCL3
TNFSF9	1.52568181431675e-13	0.282861581357559	0.798	0.762	3.05136362863351e-10	5	TNFSF9
SOCS31	1.79747682660457e-13	0.508657209968682	0.718	0.608	3.59495365320915e-10	5	SOCS3
VEGFA1	2.4785985172824e-13	0.322837104691211	0.904	0.869	4.9571970345648e-10	5	VEGFA
KDM6B	2.50405682784057e-13	0.593485008818946	0.681	0.652	5.00811365568114e-10	5	KDM6B
ID1	1.35703938485413e-12	0.403703391271677	0.794	0.658	2.71407876970826e-09	5	ID1
DST1	1.55389801446384e-12	0.612957456886577	0.936	0.875	3.10779602892769e-09	5	DST
SERPINH12	1.63126831018432e-12	0.305134162843972	0.947	0.914	3.26253662036863e-09	5	SERPINH1
IFI16	2.16467056714221e-12	0.305534480864931	0.612	0.54	4.32934113428442e-09	5	IFI16
TAGAP	2.28338142884387e-12	0.394777816733154	0.317	0.419	4.56676285768775e-09	5	TAGAP
TRIB1	9.42445337310208e-12	0.271307776070486	0.917	0.817	1.88489067462042e-08	5	TRIB1
GLUL1	1.40924208995211e-11	0.473354991709446	0.835	0.828	2.81848417990422e-08	5	GLUL
GPNMB	2.38990177207756e-11	0.289677274572935	0.573	0.315	4.77980354415513e-08	5	GPNMB
TNFRSF10D	2.48341847926189e-11	0.272481216399146	0.752	0.574	4.96683695852377e-08	5	TNFRSF10D
CDKN1C	2.60372922513751e-11	0.267558875359092	0.518	0.239	5.20745845027501e-08	5	CDKN1C
IL1B1	2.64295957051986e-11	1.36499800036756	0.628	0.515	5.28591914103973e-08	5	IL1B
PTPRC	1.16491930545515e-10	0.470469330082731	0.528	0.374	2.3298386109103e-07	5	PTPRC
MAFB	1.36375088738818e-10	0.594462133866602	0.557	0.393	2.72750177477636e-07	5	MAFB
BATF	4.65396236335534e-10	0.252349713936587	0.438	0.168	9.30792472671068e-07	5	BATF
LAPTM5	5.81230529141635e-10	0.533830929926205	0.509	0.246	1.16246105828327e-06	5	LAPTM5
ITGA51	1.15082858907629e-09	0.418507454858638	0.947	0.931	2.30165717815258e-06	5	ITGA5
CD69	1.24935416881602e-09	0.382872924951586	0.47	0.239	2.49870833763204e-06	5	CD69
RND3	1.40619680698951e-09	0.550426083741189	0.936	0.889	2.81239361397903e-06	5	RND3
CCL20	2.66751251447385e-09	0.351522664404409	0.794	0.704	5.33502502894769e-06	5	CCL20
IER5L	4.0764628222221e-09	0.580160733226255	0.787	0.763	8.1529256444442e-06	5	IER5L
G0S2	4.61744644051043e-09	0.830300267487333	0.578	0.461	9.23489288102086e-06	5	G0S2
GPR1831	5.93343264920989e-09	0.437763669904304	0.411	0.478	1.18668652984198e-05	5	GPR183
CD14	6.71417590503756e-09	0.271763201677729	0.502	0.267	1.34283518100751e-05	5	CD14
CD53	7.24927515757925e-09	0.303217271573463	0.509	0.327	1.44985503151585e-05	5	CD53
CD83	9.21449653639318e-09	0.631818718947927	0.61	0.534	1.84289930727864e-05	5	CD83
BIRC3	9.28348537626999e-09	0.381669235324139	0.817	0.765	1.856697075254e-05	5	BIRC3
HLA-DPA1	1.21668090519574e-08	0.743347626988362	0.518	0.321	2.43336181039147e-05	5	HLA-DPA1
ITGA101	1.31890588646744e-08	0.272580329578898	0.791	0.654	2.63781177293489e-05	5	ITGA10
ARL4C1	1.59742434738738e-08	0.413588794128308	0.839	0.817	3.19484869477475e-05	5	ARL4C
UBE2S1	2.14682912565817e-08	0.370163092365674	0.878	0.896	4.29365825131633e-05	5	UBE2S
COL5A1	2.96447065954182e-08	0.259180076347501	0.644	0.437	5.92894131908363e-05	5	COL5A1
SGK1	3.55781744354373e-08	0.567083126984329	0.672	0.656	7.11563488708746e-05	5	SGK1
AIF1	3.77116511180169e-08	0.272020055059365	0.569	0.431	7.54233022360338e-05	5	AIF1
ZFP36L21	4.58041001415313e-08	0.444492091519683	0.791	0.882	9.16082002830627e-05	5	ZFP36L2
C1QA	6.97513686069578e-08	0.52932570140685	0.544	0.395	0.000139502737213916	5	C1QA
C1QB	2.24942137767994e-07	0.420188341601719	0.557	0.419	0.000449884275535987	5	C1QB
CCL3L1	2.90101890550318e-07	1.16259538683762	0.638	0.567	0.000580203781100637	5	CCL3L1
CD44	3.22421314084565e-07	0.611140766373117	0.587	0.484	0.000644842628169131	5	CD44
ABL2	8.4411112349587e-07	0.422706592496158	0.878	0.82	0.00168822224699174	5	ABL2
HLA-DRB1	1.07875950929208e-06	0.718448964595529	0.433	0.22	0.00215751901858416	5	HLA-DRB1
PIK3R3	1.0861556201282e-06	0.314186213501279	0.672	0.558	0.0021723112402564	5	PIK3R3
TENT5A	1.44181328166748e-06	0.45084628036699	0.617	0.504	0.00288362656333496	5	TENT5A
CCL4L21	1.70387828651898e-06	1.10099076487819	0.606	0.518	0.00340775657303796	5	CCL4L2
RGS2	1.77321671959236e-06	0.50487203948243	0.826	0.855	0.00354643343918473	5	RGS2
HSPB1	1.8455039371125e-06	0.54992275077673	0.936	0.97	0.003691007874225	5	HSPB1
SLC2A31	2.64558219869364e-06	0.526293586768404	0.798	0.825	0.00529116439738728	5	SLC2A3
HLA-DRA1	3.05402362503539e-06	1.15256526398144	0.557	0.469	0.00610804725007079	5	HLA-DRA
RHOH	3.46562506944484e-06	0.274507603947666	0.468	0.26	0.00693125013888967	5	RHOH
REL	4.42366244479034e-06	0.571729686271288	0.658	0.684	0.00884732488958068	5	REL
CTSS	4.49215731969345e-06	0.456290737996464	0.638	0.536	0.00898431463938689	5	CTSS
C1QC	1.40386015659115e-05	0.278468008618828	0.514	0.382	0.0280772031318229	5	C1QC
COL1A2	1.92527898296943e-05	0.334572141612898	0.92	0.824	0.0385055796593886	5	COL1A2
IL7R	2.81963186551809e-05	0.287979042568662	0.511	0.382	0.0563926373103618	5	IL7R
AC004990.1	3.28137686080519e-05	0.288726751126592	0.888	0.824	0.0656275372161038	5	AC004990.1
CREM	4.10288914921128e-05	0.449960681689301	0.672	0.625	0.0820577829842255	5	CREM
APOC1	5.3415268379393e-05	0.58587429536754	0.663	0.619	0.106830536758786	5	APOC1
NFKB1	8.38697740345491e-05	0.367956295550115	0.541	0.69	0.167739548069098	5	NFKB1
ID21	0.000106835591967155	0.453744309263906	0.881	0.941	0.21367118393431	5	ID2
ZFAND2A	0.000120798309301352	0.281002247919061	0.81	0.825	0.241596618602703	5	ZFAND2A
COL1A1	0.000132519278295839	0.446378430015628	0.394	0.379	0.265038556591677	5	COL1A1
ALOX5AP	0.000346566169098208	0.497217350809351	0.557	0.46	0.693132338196415	5	ALOX5AP
AHR	0.000379008097323313	0.275628271595635	0.603	0.608	0.758016194646626	5	AHR
ERRFI11	0.000401140227627682	0.259590108149227	0.95	0.938	0.802280455255364	5	ERRFI1
TTN	0.000404239426226402	0.34298946323684	0.443	0.27	0.808478852452805	5	TTN
RASGEF1B	0.000537452911460571	0.307608641776277	0.674	0.692	1	5	RASGEF1B
TSC22D11	0.000580147489696666	0.252014917102832	0.775	0.72	1	5	TSC22D1
BAG3	0.000595817890235271	0.466127716390081	0.775	0.763	1	5	BAG3
PLEKHH21	0.000664046955637725	0.394909448243684	0.89	0.819	1	5	PLEKHH2
PLAUR1	0.000709854137059656	0.423328910573154	0.883	0.794	1	5	PLAUR
FAM107B	0.000773562886874733	0.328082839308077	0.585	0.538	1	5	FAM107B
COL3A1	0.000833711023308126	0.351249979810988	0.466	0.305	1	5	COL3A1
CXCL21	0.00132620498300898	0.661520228055268	0.578	0.526	1	5	CXCL2
CDC42EP3	0.00158184116325042	0.414005602607352	0.651	0.65	1	5	CDC42EP3
ID31	0.00254889996995603	0.357262984280254	0.812	0.804	1	5	ID3
GADD45G	0.00379868789604067	0.29053007652885	0.399	0.386	1	5	GADD45G
SOX6	0.00408302953214299	0.299892626578518	0.856	0.797	1	5	SOX6
ATP1B3	0.00478520328126847	0.259704622868031	0.695	0.82	1	5	ATP1B3
CTSB	0.00614715057766295	0.352658672179614	0.732	0.779	1	5	CTSB
CDKN1A	0.00640029912087234	0.399511508454923	0.745	0.8	1	5	CDKN1A
NAMPT1	0.00650875419181453	0.364856801877248	0.933	0.936	1	5	NAMPT
SOX4	0.0068370510306298	0.260100556878993	0.631	0.549	1	5	SOX4
