# Supplementary material for: Single-Cell Transcriptome Profiling Reveals Intratumoral Heterogeneity in Human Chordomas
Source: Research Square preprint supplement (doi:10.21203/rs.3.rs-167938/v1), 2021-02-04
Supplement: Supplementary file 2 [file 7dd30902232c299ea37497c9.csv]

	p_val	avg_logFC	pct.1	pct.2	p_val_adj	cluster	gene
SFRP2	0	1.04922437252532	0.915	0.666	0	0	SFRP2
THBS2	0	0.947140027915169	0.955	0.815	0	0	THBS2
ITGBL1	0	0.853693957212102	0.903	0.698	0	0	ITGBL1
DCN	0	0.70590750974984	0.996	0.853	0	0	DCN
CCDC80	0	0.611620598990541	0.965	0.729	0	0	CCDC80
TAGLN	7.70761370221546e-305	0.615507285888328	0.996	0.876	1.54152274044309e-301	0	TAGLN
FHL2	1.0752500948276e-298	0.539122276392179	0.951	0.729	2.15050018965521e-295	0	FHL2
AEBP1	1.46791969583307e-289	0.472098088161669	0.956	0.81	2.93583939166614e-286	0	AEBP1
COL6A3	8.72836580448605e-289	0.613052116536812	0.959	0.793	1.74567316089721e-285	0	COL6A3
COL1A2	1.2316276903543e-278	0.797934821500809	0.996	0.914	2.4632553807086e-275	0	COL1A2
COL8A1	2.1243718979724e-278	0.577948881469075	0.905	0.744	4.24874379594479e-275	0	COL8A1
POSTN	4.4387724513741e-277	0.98961505224797	0.982	0.864	8.87754490274819e-274	0	POSTN
NNMT	2.48376475572284e-275	0.276883011528287	0.959	0.763	4.96752951144568e-272	0	NNMT
CFH	1.8665064115944e-263	0.286302737828503	0.955	0.814	3.7330128231888e-260	0	CFH
PRELP	9.75801301650718e-261	0.685582858378441	0.92	0.809	1.95160260330144e-257	0	PRELP
COL10A1	1.83541408592769e-259	0.407395174610887	0.834	0.581	3.67082817185538e-256	0	COL10A1
CLDN11	1.62546540443011e-254	0.429237984692304	0.968	0.772	3.25093080886022e-251	0	CLDN11
UACA	2.46911100710796e-243	0.476437533714245	0.925	0.764	4.93822201421592e-240	0	UACA
HMCN1	5.66959887145594e-242	0.251465267326766	0.858	0.737	1.13391977429119e-238	0	HMCN1
MXRA8	1.09369192591652e-236	0.251049902423651	0.932	0.727	2.18738385183303e-233	0	MXRA8
CDH11	3.65535003413816e-234	0.304996063688744	0.954	0.742	7.31070006827632e-231	0	CDH11
LTBP2	1.42626343485836e-231	0.36184456275239	0.953	0.786	2.85252686971671e-228	0	LTBP2
CTHRC1	8.54120313042858e-228	0.63090537073368	0.959	0.78	1.70824062608572e-224	0	CTHRC1
F2R	1.94571448192993e-221	0.290305478760389	0.9	0.677	3.89142896385986e-218	0	F2R
SLC6A6	1.66730866360885e-219	0.480684571370735	0.811	0.664	3.3346173272177e-216	0	SLC6A6
C7	4.82279328071436e-219	0.458048822390425	0.908	0.706	9.64558656142871e-216	0	C7
COL1A1	2.73212170742677e-216	0.911450958212267	0.986	0.886	5.46424341485355e-213	0	COL1A1
TGFBR2	3.72065140165819e-205	0.322508745562482	0.865	0.705	7.44130280331638e-202	0	TGFBR2
BGN	1.84041677382435e-204	0.550674492160818	0.983	0.881	3.6808335476487e-201	0	BGN
COL15A1	1.18748701596584e-197	0.324655213358162	0.921	0.841	2.37497403193169e-194	0	COL15A1
COL11A1	1.15091954449657e-196	0.527003789348729	0.818	0.723	2.30183908899314e-193	0	COL11A1
MFAP5	2.84673937738327e-191	0.396580657526228	0.904	0.713	5.69347875476653e-188	0	MFAP5
CTGF	9.01284326998786e-190	0.391550507282629	0.985	0.869	1.80256865399757e-186	0	CTGF
LOXL2	4.48934306919927e-185	0.3561060732674	0.867	0.7	8.97868613839855e-182	0	LOXL2
MICAL2	8.5876828878221e-184	0.329462886958759	0.799	0.603	1.71753657756442e-180	0	MICAL2
COL5A2	3.31684079569765e-181	0.513739439979708	0.919	0.814	6.63368159139529e-178	0	COL5A2
COL3A1	3.58078659633863e-181	0.591119600904828	0.989	0.892	7.16157319267726e-178	0	COL3A1
TGM2	1.80867755903661e-180	0.281857749206655	0.926	0.581	3.61735511807322e-177	0	TGM2
THBS1	2.5862642883687e-180	0.55038558799021	0.882	0.782	5.17252857673739e-177	0	THBS1
SULF1	6.59684554673621e-179	0.586994818794194	0.909	0.812	1.31936910934724e-175	0	SULF1
IGFBP2	1.10691514426143e-176	0.690291335308382	0.987	0.852	2.21383028852286e-173	0	IGFBP2
SFRP4	2.25096736324902e-173	0.584150818482052	0.92	0.734	4.50193472649803e-170	0	SFRP4
EFEMP1	3.99045637773912e-170	0.301396027954218	0.855	0.565	7.98091275547824e-167	0	EFEMP1
SSPN	9.78863519879301e-169	0.303578291377907	0.872	0.745	1.9577270397586e-165	0	SSPN
NTM	4.95975840679718e-158	0.253136258115763	0.952	0.793	9.91951681359437e-155	0	NTM
MGP	1.02620989876962e-155	0.475112051876716	0.993	0.892	2.05241979753925e-152	0	MGP
COL4A1	1.76428496294957e-151	0.330073631567894	0.946	0.777	3.52856992589913e-148	0	COL4A1
FAP	2.77687407301274e-151	0.259353049780197	0.891	0.74	5.55374814602548e-148	0	FAP
LUM	3.88795744810522e-151	0.460893705172552	0.988	0.811	7.77591489621044e-148	0	LUM
ARL4C	7.85882490483007e-151	0.354520231118365	0.962	0.871	1.57176498096601e-147	0	ARL4C
LAMB1	6.22056697479472e-150	0.253678340471785	0.858	0.761	1.24411339495894e-146	0	LAMB1
NBL1	7.00134557723771e-149	0.273692619492	0.887	0.724	1.40026911544754e-145	0	NBL1
CCL2	1.05380497405959e-143	0.534151491718284	0.928	0.756	2.10760994811919e-140	0	CCL2
LMO7	1.24750073767669e-143	0.292829975535452	0.797	0.668	2.49500147535337e-140	0	LMO7
MXRA5	3.70002070512952e-142	0.314113171202329	0.718	0.462	7.40004141025905e-139	0	MXRA5
VCAN	9.0430221154961e-142	0.257607977444654	0.965	0.777	1.80860442309922e-138	0	VCAN
COL5A1	3.24900630558936e-141	0.467992942446594	0.844	0.743	6.49801261117872e-138	0	COL5A1
FRMD6	5.83974123087719e-132	0.269290242904003	0.83	0.684	1.16794824617544e-128	0	FRMD6
TNFAIP6	6.73406478697037e-132	0.250774125277698	0.803	0.656	1.34681295739407e-128	0	TNFAIP6
CERCAM	1.76845841461272e-131	0.2557496647445	0.823	0.715	3.53691682922544e-128	0	CERCAM
LEPR	1.45130056146136e-127	0.290633526225376	0.771	0.612	2.90260112292272e-124	0	LEPR
FIBIN	1.11409781912706e-124	0.32204747888405	0.78	0.637	2.22819563825412e-121	0	FIBIN
INHBA	2.18774299845676e-121	0.411757028070017	0.762	0.684	4.37548599691352e-118	0	INHBA
CALD1	8.77599639746319e-105	0.266355637094356	0.994	0.797	1.75519927949264e-101	0	CALD1
CAVIN2	1.97403537586794e-104	0.253310616827449	0.827	0.743	3.94807075173587e-101	0	CAVIN2
COL12A1	1.14953014140388e-102	0.406295645381843	0.752	0.588	2.29906028280775e-99	0	COL12A1
FGF7	3.70696093816901e-101	0.284186338429204	0.785	0.652	7.41392187633802e-98	0	FGF7
COL16A1	2.35752488694925e-91	0.286831471489405	0.75	0.651	4.71504977389849e-88	0	COL16A1
EDIL3	3.3630178457071e-91	0.282823254396768	0.851	0.813	6.7260356914142e-88	0	EDIL3
SPARC	1.93983164868858e-88	0.421304366018159	0.987	0.863	3.87966329737716e-85	0	SPARC
RARRES1	1.26621489517105e-72	0.306695105691731	0.82	0.589	2.5324297903421e-69	0	RARRES1
FMO2	7.06585682020495e-63	0.347435626326689	0.718	0.63	1.41317136404099e-59	0	FMO2
TIMP1	1.08014353519937e-53	0.312206011356842	0.998	0.942	2.16028707039874e-50	0	TIMP1
MATN3	1.37043405815285e-49	0.429432123702869	0.589	0.317	2.74086811630571e-46	0	MATN3
DPEP1	1.99829814176981e-47	0.295714209448446	0.6	0.459	3.99659628353962e-44	0	DPEP1
CCL26	2.56176818515641e-38	0.289041618197821	0.802	0.765	5.12353637031283e-35	0	CCL26
HHIP	1.16949394186869e-28	0.376804924467458	0.622	0.644	2.33898788373737e-25	0	HHIP
COMP	0.000191016336726022	0.408145087970393	0.569	0.564	0.382032673452044	0	COMP
SERPINB2	0	0.665469401258701	0.147	0.677	0	1	SERPINB2
ALKAL2	0	0.40031537784393	0.168	0.67	0	1	ALKAL2
GALNT15	0	0.357151276416224	0.095	0.339	0	1	GALNT15
HBA1	0	0.307858196888551	0.116	0.463	0	1	HBA1
CDA	0	0.278496612889699	0.072	0.535	0	1	CDA
SFRP1	0	0.274912488063824	0.957	0.487	0	1	SFRP1
HIST1H2AC	4.68648572743422e-305	0.429062783825979	0.174	0.713	9.37297145486844e-302	1	HIST1H2AC
DPT	3.94723428350848e-281	0.661811761929319	0.129	0.272	7.89446856701696e-278	1	DPT
CXCL3	1.94742517318075e-278	0.366563961985521	0.084	0.416	3.8948503463615e-275	1	CXCL3
C1QB	3.02807741346978e-262	0.260283162604353	0.137	0.48	6.05615482693956e-259	1	C1QB
TMEM37	4.32995257987169e-257	0.742237045438291	0.159	0.433	8.65990515974337e-254	1	TMEM37
NPR3	2.14872063872862e-249	0.443223193996434	0.089	0.366	4.29744127745725e-246	1	NPR3
TP53I3	3.77496666078054e-245	0.321406402883363	0.219	0.667	7.54993332156107e-242	1	TP53I3
GPNMB	5.11938947058551e-231	0.705470530849585	0.992	0.709	1.0238778941171e-227	1	GPNMB
TIMP3	8.42506500472156e-224	0.5749155705237	0.992	0.836	1.68501300094431e-220	1	TIMP3
IL1A	9.72264297518586e-222	0.27424522114459	0.139	0.312	1.94452859503717e-218	1	IL1A
TMEM176B	9.58662424186879e-214	0.308729540308808	0.15	0.374	1.91732484837376e-210	1	TMEM176B
SPOCK1	6.64890793160633e-213	0.61475330559897	0.22	0.634	1.32978158632127e-209	1	SPOCK1
WNT4	7.85629558146077e-213	0.572322147766959	0.202	0.536	1.57125911629215e-209	1	WNT4
HLA-DRA	1.29207494077564e-208	0.344130305718119	0.198	0.623	2.58414988155128e-205	1	HLA-DRA
HLA-DPA1	5.12976294367759e-207	0.392020288063222	0.187	0.626	1.02595258873552e-203	1	HLA-DPA1
MGLL	6.55038223745177e-203	0.472701825635604	0.201	0.546	1.31007644749035e-199	1	MGLL
CD83	7.49415896433872e-199	0.792381335417384	0.183	0.407	1.49883179286774e-195	1	CD83
OSR2	4.07441363786455e-194	0.822219481039432	0.219	0.503	8.1488272757291e-191	1	OSR2
IL23A	2.95690644020845e-193	0.25868151733429	0.268	0.483	5.9138128804169e-190	1	IL23A
ALDH1A1	6.8234401048265e-192	0.44133098467612	0.224	0.464	1.3646880209653e-188	1	ALDH1A1
FST	8.43062767948397e-192	0.354579552948008	0.965	0.616	1.68612553589679e-188	1	FST
RETREG1	2.35127736031522e-187	0.629781487474684	0.203	0.394	4.70255472063044e-184	1	RETREG1
BNIP3	2.59975816461116e-186	0.817546497248356	0.996	0.764	5.19951632922232e-183	1	BNIP3
PLIN2	8.73579157230679e-186	0.388599125376293	0.261	0.71	1.74715831446136e-182	1	PLIN2
ICAM2	7.74395665480838e-184	0.403169522108471	0.153	0.448	1.54879133096168e-180	1	ICAM2
GJA1	1.89463019633688e-183	0.651050667609808	0.279	0.803	3.78926039267375e-180	1	GJA1
LSAMP	1.43102107675209e-182	0.303522040643623	0.224	0.523	2.86204215350418e-179	1	LSAMP
SLC6A8	1.03951456131491e-181	0.453654110596271	0.195	0.504	2.07902912262983e-178	1	SLC6A8
CCL5	1.80784478341272e-180	0.347707115333408	0.167	0.498	3.61568956682544e-177	1	CCL5
ITGA6	2.8950526394171e-173	0.40988063496084	0.203	0.459	5.7901052788342e-170	1	ITGA6
TREM1	1.12538430356428e-171	0.297675784606265	0.274	0.627	2.25076860712856e-168	1	TREM1
ENPP2	1.20614105561979e-170	0.318975049331636	0.208	0.575	2.41228211123957e-167	1	ENPP2
IGF1	1.25412414697864e-166	0.388251974453813	0.801	0.328	2.50824829395727e-163	1	IGF1
IL1RL1	1.06322240597107e-161	1.04760870741883	0.276	0.642	2.12644481194215e-158	1	IL1RL1
PAMR1	2.61572274527432e-161	0.353516869304118	0.195	0.57	5.23144549054864e-158	1	PAMR1
PALMD	3.78892114519163e-160	0.749334269910854	0.303	0.729	7.57784229038325e-157	1	PALMD
PLAU	3.47951104810047e-158	0.263255884696971	0.97	0.676	6.95902209620093e-155	1	PLAU
MMP2	4.03055952195199e-150	0.642732869933459	0.23	0.554	8.06111904390399e-147	1	MMP2
ARL4D	6.79075950021251e-149	0.39643659666592	0.208	0.578	1.3581519000425e-145	1	ARL4D
CHI3L2	1.85562690864634e-148	0.749908950358481	0.283	0.692	3.71125381729268e-145	1	CHI3L2
OTUD1	1.06381944317593e-146	0.800619402482503	0.264	0.525	2.12763888635187e-143	1	OTUD1
EPYC	3.92268744927162e-143	0.746987500117665	0.389	0.819	7.84537489854324e-140	1	EPYC
RGCC	6.04353182518433e-141	0.973212626940684	0.832	0.607	1.20870636503687e-137	1	RGCC
C2	4.14345840362535e-138	0.358860397988707	0.322	0.663	8.28691680725069e-135	1	C2
LCP1	3.5861069989807e-137	0.525873798634936	0.241	0.329	7.1722139979614e-134	1	LCP1
ITPKC	2.53301224206454e-134	0.304494876235818	0.906	0.49	5.06602448412908e-131	1	ITPKC
CPXM1	1.21299782548065e-133	0.728721043904792	0.263	0.446	2.4259956509613e-130	1	CPXM1
NID2	1.93958250835841e-130	0.286515823595988	0.319	0.571	3.87916501671683e-127	1	NID2
GPR183	7.12467387849168e-129	0.34914299001641	0.17	0.565	1.42493477569834e-125	1	GPR183
ITGB8	1.13874819874331e-126	0.799137092874309	0.319	0.709	2.27749639748662e-123	1	ITGB8
CCL4	2.29815824479978e-121	0.485128460638094	0.289	0.55	4.59631648959957e-118	1	CCL4
MAFB	3.76102220960996e-121	0.373630891983732	0.272	0.517	7.52204441921992e-118	1	MAFB
BMP2	5.50494498761042e-121	0.364048382665119	0.216	0.413	1.10098899752208e-117	1	BMP2
CHRDL1	2.65435854484106e-116	1.06821119173627	0.256	0.319	5.30871708968212e-113	1	CHRDL1
C15orf48	1.78443157449911e-115	0.336692802780341	0.337	0.613	3.56886314899822e-112	1	C15orf48
SLC40A1	1.07480856699743e-113	0.718030284697972	0.334	0.789	2.14961713399486e-110	1	SLC40A1
C1QA	2.24022477529387e-112	0.321744315532926	0.834	0.569	4.48044955058775e-109	1	C1QA
MEDAG	1.03578235044111e-111	0.37126304049309	0.36	0.666	2.07156470088222e-108	1	MEDAG
INSR	1.12792022817825e-108	0.344991260168153	0.293	0.582	2.25584045635651e-105	1	INSR
VCAM1	1.93093401164533e-108	0.531142867303117	0.949	0.679	3.86186802329066e-105	1	VCAM1
FGF71	2.49811471060582e-104	0.307149499268087	0.97	0.647	4.99622942121164e-101	1	FGF7
CD74	4.00695592798221e-102	0.606261546321085	0.27	0.552	8.01391185596441e-99	1	CD74
CTSS	3.02600874403487e-101	0.303086702431057	0.331	0.602	6.05201748806974e-98	1	CTSS
TNFAIP2	2.26981174070471e-100	0.957614650121716	0.281	0.413	4.53962348140943e-97	1	TNFAIP2
HLA-DQB1	1.41407854900195e-97	0.321922540167025	0.685	0.402	2.82815709800391e-94	1	HLA-DQB1
IL1B	1.48170835106669e-93	0.959883744213573	0.322	0.636	2.96341670213338e-90	1	IL1B
PRDM1	1.58264368431512e-93	0.776150766151618	0.292	0.539	3.16528736863025e-90	1	PRDM1
GPRC5B	3.92874328665231e-90	0.375931234913144	0.371	0.669	7.85748657330462e-87	1	GPRC5B
ID4	3.47521591100618e-89	0.313575859644857	0.504	0.755	6.95043182201236e-86	1	ID4
CD82	2.41503022625572e-87	0.976820970679882	0.34	0.695	4.83006045251144e-84	1	CD82
CRISPLD2	2.60475875317258e-86	0.634060634300015	0.311	0.627	5.20951750634517e-83	1	CRISPLD2
RBP1	7.41376560443297e-85	0.425078077563891	0.882	0.777	1.48275312088659e-81	1	RBP1
ISG15	4.73408376289051e-84	0.392828548793381	0.449	0.785	9.46816752578101e-81	1	ISG15
SLC2A1	6.22923042409913e-84	0.320458495859523	0.659	0.881	1.24584608481983e-80	1	SLC2A1
IL1R1	1.70993187749951e-82	0.553092172830905	0.351	0.716	3.41986375499902e-79	1	IL1R1
EDNRB	3.36479845778494e-81	0.312894876855145	0.399	0.589	6.72959691556989e-78	1	EDNRB
CRLF1	7.64373825087652e-81	0.679830462338301	0.365	0.615	1.5287476501753e-77	1	CRLF1
CXCL8	1.72183650497227e-79	0.925713390301658	0.323	0.645	3.44367300994454e-76	1	CXCL8
APCDD1	7.27050027455482e-79	1.02362856351859	0.308	0.429	1.45410005491096e-75	1	APCDD1
ABI3BP	1.63560064474054e-78	0.668902466483745	0.395	0.693	3.27120128948108e-75	1	ABI3BP
HLA-DPB1	7.28194366610979e-77	0.464882290774216	0.275	0.441	1.45638873322196e-73	1	HLA-DPB1
PAPPA	6.61844041509979e-76	1.04122112145012	0.359	0.551	1.32368808301996e-72	1	PAPPA
RAB31	9.41517784402297e-75	0.644679828992943	0.465	0.759	1.88303556880459e-71	1	RAB31
SULF2	2.76462115956058e-70	0.766408816886836	0.368	0.644	5.52924231912116e-67	1	SULF2
CXCL2	2.48497820370485e-69	0.673220533367194	0.321	0.52	4.9699564074097e-66	1	CXCL2
PDGFRA	8.21219163345064e-69	0.341422567395716	0.332	0.53	1.64243832669013e-65	1	PDGFRA
CFD	3.67556188443459e-67	0.809467419069468	0.679	0.412	7.35112376886919e-64	1	CFD
ADAMTS5	3.14187346858588e-66	1.04145438178512	0.32	0.36	6.28374693717176e-63	1	ADAMTS5
RORB	3.78465902854752e-66	1.0294249100201	0.306	0.3	7.56931805709505e-63	1	RORB
ZEB1	2.01453628442608e-65	0.284867137091555	0.606	0.759	4.02907256885216e-62	1	ZEB1
NFKBIZ	2.25723497004737e-65	0.718188904522964	0.344	0.64	4.51446994009475e-62	1	NFKBIZ
CXCL14	3.50334176091896e-65	0.363171905690872	0.359	0.517	7.00668352183792e-62	1	CXCL14
NR1D1	2.05518609437922e-63	0.367057975603327	0.862	0.537	4.11037218875845e-60	1	NR1D1
CCL8	6.86072257106811e-61	0.491208700105786	0.436	0.498	1.37214451421362e-57	1	CCL8
IGFBP1	5.24376940643569e-60	0.778369355588794	0.656	0.483	1.04875388128714e-56	1	IGFBP1
FBLN2	9.54105486170036e-59	0.653767273574938	0.438	0.685	1.90821097234007e-55	1	FBLN2
CST2	5.66680037023515e-58	0.41171939898826	0.474	0.691	1.13336007404703e-54	1	CST2
ASS1	1.49920969409315e-57	0.269851103959567	0.757	0.564	2.9984193881863e-54	1	ASS1
DAB2	7.00282486878361e-57	0.37373274416858	0.617	0.785	1.40056497375672e-53	1	DAB2
KDR	1.23837893528074e-54	0.292732399937891	0.471	0.586	2.47675787056148e-51	1	KDR
PRSS23	3.31653386649225e-54	0.411741659084252	0.375	0.65	6.6330677329845e-51	1	PRSS23
FTL	5.38475018377494e-54	0.357417589586424	0.999	0.995	1.07695003675499e-50	1	FTL
MFAP4	3.24333006303595e-52	0.868381911647195	0.361	0.577	6.4866601260719e-49	1	MFAP4
RRAD	4.38196823288692e-52	0.307199604742399	0.343	0.558	8.76393646577384e-49	1	RRAD
HTRA1	3.04134869099038e-49	0.476376575776323	0.44	0.658	6.08269738198076e-46	1	HTRA1
LDLR	5.61017482461881e-49	0.256907492540865	0.792	0.473	1.12203496492376e-45	1	LDLR
H2AFZ	8.18639794634009e-49	0.295141592372175	0.5	0.816	1.63727958926802e-45	1	H2AFZ
SCARA5	2.41054193835053e-48	0.780290556552029	0.397	0.6	4.82108387670106e-45	1	SCARA5
PLPP1	3.53055752347057e-48	0.941581610540273	0.338	0.507	7.06111504694114e-45	1	PLPP1
IGFBP4	7.51943100558834e-48	0.420291866031717	0.85	0.882	1.50388620111767e-44	1	IGFBP4
FBN1	1.46108178941301e-47	0.287831937785358	0.706	0.805	2.92216357882602e-44	1	FBN1
OMD	2.04357112579918e-46	0.262766653097024	0.377	0.518	4.08714225159837e-43	1	OMD
HSD11B1	7.14900255053137e-46	0.762221628749324	0.656	0.502	1.42980051010627e-42	1	HSD11B1
ARC	2.77881343289693e-45	0.768400209822879	0.369	0.468	5.55762686579385e-42	1	ARC
BAG3	1.28600291736564e-44	0.296814066562743	0.667	0.726	2.57200583473129e-41	1	BAG3
TNFAIP3	5.15341310361353e-44	0.78782461560183	0.37	0.568	1.03068262072271e-40	1	TNFAIP3
CCL3	5.31161735735224e-43	0.975217048907821	0.397	0.651	1.06232347147045e-39	1	CCL3
DKK1	1.07767734612532e-42	0.305249813803457	0.615	0.493	2.15535469225064e-39	1	DKK1
THSD7A	3.81927521614236e-41	0.615466516757718	0.336	0.244	7.63855043228471e-38	1	THSD7A
EFEMP11	6.47555661103814e-40	0.367490514897366	0.423	0.726	1.29511132220763e-36	1	EFEMP1
GBP1	7.85471558129822e-40	0.334164858701698	0.668	0.687	1.57094311625964e-36	1	GBP1
FGF2	4.34628794785301e-39	0.349994106268109	0.845	0.679	8.69257589570602e-36	1	FGF2
KLF4	1.74411925107232e-38	0.617956382865924	0.515	0.698	3.48823850214463e-35	1	KLF4
RAMP1	1.87185637247851e-38	0.8636831634481	0.404	0.654	3.74371274495702e-35	1	RAMP1
SLC9A3R2	7.65139702922139e-35	0.508211778947234	0.891	0.616	1.53027940584428e-31	1	SLC9A3R2
CLEC2B	2.09067703739358e-33	0.976619581833085	0.49	0.778	4.18135407478717e-30	1	CLEC2B
KDM6B	2.58039707400254e-33	0.296153843970051	0.927	0.595	5.16079414800508e-30	1	KDM6B
CD68	3.82593789670705e-33	0.61695776823034	0.397	0.415	7.65187579341411e-30	1	CD68
CLEC3B	1.34885584090427e-32	0.275209544461753	0.196	0.378	2.69771168180853e-29	1	CLEC3B
CES1	1.39412319362249e-32	0.286446122691088	0.288	0.34	2.78824638724497e-29	1	CES1
OLFML3	1.82764787912998e-32	0.439450466868225	0.986	0.659	3.65529575825997e-29	1	OLFML3
MXRA81	2.46978843330218e-32	0.254956447688132	0.781	0.809	4.93957686660435e-29	1	MXRA8
TM4SF1	5.18737447820704e-32	0.342545063176906	0.751	0.787	1.03747489564141e-28	1	TM4SF1
SOCS3	8.46307493402045e-32	0.431561068252414	0.489	0.665	1.69261498680409e-28	1	SOCS3
ADM	1.54415000989163e-31	0.909336105519817	0.481	0.821	3.08830001978325e-28	1	ADM
CCL3L1	3.20558212424557e-31	0.455919092984565	0.412	0.555	6.41116424849113e-28	1	CCL3L1
SOX4	5.87920884361494e-29	0.471602347335193	0.993	0.74	1.17584176872299e-25	1	SOX4
SPON2	9.53931493959027e-29	0.973886154315883	0.936	0.731	1.90786298791805e-25	1	SPON2
PLPP3	1.36729285545683e-28	0.846830896838952	0.392	0.466	2.73458571091366e-25	1	PLPP3
MMP19	4.74098732746011e-28	0.252907712350398	0.519	0.574	9.48197465492022e-25	1	MMP19
BTG2	9.00586952769704e-28	0.35094972657529	0.619	0.676	1.80117390553941e-24	1	BTG2
AHNAK2	1.4418208864013e-25	0.34330036691309	0.587	0.395	2.88364177280259e-22	1	AHNAK2
MDK	4.18303136501917e-24	0.593256005905732	0.615	0.711	8.36606273003835e-21	1	MDK
NPC2	2.67665525287239e-23	0.93354562910751	0.99	0.865	5.35331050574478e-20	1	NPC2
RASD1	7.57044127227021e-23	0.806131678164433	0.677	0.407	1.51408825445404e-19	1	RASD1
GADD45G	7.95877700871479e-22	1.24809001252921	0.401	0.624	1.59175540174296e-18	1	GADD45G
OAF	5.17865997902592e-21	0.615451967368826	0.929	0.729	1.03573199580518e-17	1	OAF
TRIB1	3.51095016924338e-20	0.644826839546277	0.759	0.561	7.02190033848676e-17	1	TRIB1
CXCL1	3.84437345573778e-20	0.648844934466485	0.779	0.773	7.68874691147556e-17	1	CXCL1
MIR503HG	5.23099833018542e-20	0.262307433300271	0.562	0.686	1.04619966603708e-16	1	MIR503HG
NID1	6.02770019456455e-19	0.429377696817633	0.671	0.654	1.20554003891291e-15	1	NID1
JAM2	8.78426499921395e-19	0.406260351364645	0.941	0.676	1.75685299984279e-15	1	JAM2
VGLL3	1.33694067678075e-18	0.344922478028005	0.794	0.646	2.6738813535615e-15	1	VGLL3
LGALS9	2.52803876541311e-18	0.329575337865316	0.462	0.516	5.05607753082622e-15	1	LGALS9
SGK1	5.21396140840678e-18	0.43127650064003	0.944	0.723	1.04279228168136e-14	1	SGK1
CDKN1C	1.42838607601335e-17	0.430815278107883	0.444	0.481	2.85677215202671e-14	1	CDKN1C
RBP4	2.91987597526759e-17	1.51519421601138	0.546	0.706	5.83975195053519e-14	1	RBP4
PON2	6.06747149926328e-17	0.445601343587875	0.884	0.78	1.21349429985266e-13	1	PON2
FBLN1	2.29270826372862e-16	0.71624868537085	0.668	0.796	4.58541652745723e-13	1	FBLN1
HSPB6	2.3358311329886e-16	0.906935578353693	0.464	0.686	4.6716622659772e-13	1	HSPB6
TUBA1A	2.9872064214732e-16	0.394656069918121	0.871	0.844	5.97441284294641e-13	1	TUBA1A
C1S	3.09650497930237e-16	0.459994416798354	0.77	0.831	6.19300995860474e-13	1	C1S
RND3	1.79180899021636e-15	0.662325128069444	0.464	0.734	3.58361798043273e-12	1	RND3
CD44	4.76441891840793e-15	0.664520920210627	0.586	0.71	9.52883783681585e-12	1	CD44
HSPH1	3.37346991700131e-14	0.297918139126371	0.893	0.823	6.74693983400262e-11	1	HSPH1
VCAN1	3.70360390555297e-13	0.315455270086849	0.721	0.874	7.40720781110594e-10	1	VCAN
CCL4L2	8.97418326750645e-13	0.529403728473665	0.447	0.507	1.79483665350129e-09	1	CCL4L2
FN1	1.31004446531913e-12	0.546399824952889	1	0.966	2.62008893063827e-09	1	FN1
EGR1	4.23287671291184e-12	0.430524441737782	0.764	0.769	8.46575342582368e-09	1	EGR1
IER2	4.55418718914982e-12	0.363111688732794	0.72	0.767	9.10837437829963e-09	1	IER2
TAF9	5.49900607434556e-12	0.304799612056292	0.862	0.615	1.09980121486911e-08	1	TAF9
CERS6	7.60426623270597e-12	0.314884282311057	0.597	0.63	1.52085324654119e-08	1	CERS6
ADAMTS1	2.03687064879035e-11	0.757240186646427	0.449	0.589	4.07374129758069e-08	1	ADAMTS1
NFIL3	2.17336041402714e-11	0.35103942167074	0.567	0.574	4.34672082805427e-08	1	NFIL3
ZFP36L2	3.99118886908193e-11	0.385356412175	0.981	0.802	7.98237773816387e-08	1	ZFP36L2
RDH10	5.34184178779773e-11	0.522370808163178	0.98	0.796	1.06836835755955e-07	1	RDH10
SRPX2	1.18591148156056e-09	0.257678499856363	0.953	0.726	2.37182296312112e-06	1	SRPX2
UCHL1	2.05780334939784e-09	0.46310201806062	0.781	0.867	4.11560669879567e-06	1	UCHL1
SEMA3A	2.58581944484883e-09	0.508311537351601	0.532	0.732	5.17163888969767e-06	1	SEMA3A
CYR61	2.74775735079002e-09	0.332500397725625	0.694	0.852	5.49551470158004e-06	1	CYR61
SELENOP	1.02110242938842e-08	0.539311415056785	0.51	0.55	2.04220485877683e-05	1	SELENOP
HSPA5	3.82321852482194e-08	0.44021047243373	0.983	0.88	7.64643704964388e-05	1	HSPA5
ARID5B	1.2431583920891e-07	0.541123101625142	0.876	0.775	0.000248631678417821	1	ARID5B
C1R	1.83047400647447e-07	0.616583634529581	0.992	0.872	0.000366094801294894	1	C1R
SERPING1	2.33671797722344e-07	0.627253853146349	0.651	0.824	0.000467343595444689	1	SERPING1
TMEM176A	3.10999418610415e-07	0.374483612296494	0.44	0.416	0.00062199883722083	1	TMEM176A
SEMA5A	3.98223160250245e-07	0.496429361946849	0.646	0.741	0.00079644632050049	1	SEMA5A
IGFBP3	4.89017270234072e-07	1.08982863360759	0.581	0.594	0.000978034540468144	1	IGFBP3
PLA2G7	1.10010147741386e-06	0.559473534129001	0.531	0.343	0.00220020295482772	1	PLA2G7
PLAGL1	1.33882874041002e-06	0.462582116762123	0.821	0.642	0.00267765748082004	1	PLAGL1
ENPP1	1.4041131790153e-06	0.351310844883574	0.938	0.715	0.00280822635803061	1	ENPP1
TMEM98	2.26728110324636e-06	0.376261046904932	0.907	0.804	0.00453456220649272	1	TMEM98
MGST1	2.75458124123148e-06	0.548611571801649	0.593	0.795	0.00550916248246296	1	MGST1
ATF3	2.93019665181535e-06	0.40999865243187	0.791	0.732	0.0058603933036307	1	ATF3
PODXL	3.05573526313434e-06	0.350336079232079	0.762	0.673	0.00611147052626867	1	PODXL
FBLN5	3.56795856620387e-06	0.486423964595672	0.646	0.663	0.00713591713240775	1	FBLN5
C3	3.95858415471541e-06	0.643338361560453	0.837	0.719	0.00791716830943083	1	C3
CTSK	6.16784873495095e-06	0.680387181864847	0.73	0.734	0.0123356974699019	1	CTSK
PRUNE2	6.26347394509735e-06	0.715986953225628	0.635	0.711	0.0125269478901947	1	PRUNE2
CD248	1.40611337881549e-05	1.06410561788147	0.559	0.573	0.0281222675763098	1	CD248
CTSL	1.50337896703702e-05	0.601635856043082	0.515	0.746	0.0300675793407405	1	CTSL
LTBP1	1.59221387252149e-05	0.476616464389248	0.83	0.731	0.0318442774504298	1	LTBP1
CLMP	1.85799285648377e-05	0.763285925654286	0.615	0.667	0.0371598571296753	1	CLMP
CFH1	2.27093920652856e-05	0.256316626790097	0.987	0.842	0.0454187841305711	1	CFH
CITED2	2.30968086098805e-05	0.325453288041646	0.617	0.543	0.0461936172197609	1	CITED2
KLF6	2.71407377371532e-05	0.495202656576759	0.518	0.772	0.0542814754743065	1	KLF6
UGP2	5.04604118575914e-05	0.380849383784305	0.971	0.696	0.100920823715183	1	UGP2
FXYD1	6.20666081475173e-05	0.389414513812223	0.857	0.584	0.124133216295035	1	FXYD1
TXNIP	0.000153499204462107	0.274358041432723	0.543	0.705	0.306998408924213	1	TXNIP
SERPINF1	0.000201886331464136	0.52625403779699	0.996	0.778	0.403772662928271	1	SERPINF1
IER3	0.000211228990577369	0.86617432880419	0.831	0.746	0.422457981154738	1	IER3
CTGF1	0.000240544469830275	0.327532686238981	0.985	0.897	0.48108893966055	1	CTGF
S100A16	0.000873345206570363	0.297900179954666	0.808	0.771	1	1	S100A16
ISLR	0.000888362726777024	0.619833703997103	0.732	0.719	1	1	ISLR
PDPN	0.00100481508087254	0.281832777645829	0.614	0.56	1	1	PDPN
FYN	0.00113968901935528	0.454372916870045	0.819	0.586	1	1	FYN
GAL	0.00136254591052022	0.451070547673335	0.495	0.319	1	1	GAL
HIST1H1C	0.00142259923197204	0.251529281797364	0.686	0.709	1	1	HIST1H1C
TGM21	0.00169525406708801	0.26054676309993	0.675	0.717	1	1	TGM2
GADD45B	0.0049371612299077	0.375391047732597	0.616	0.836	1	1	GADD45B
IER5	0.00610957695922298	0.341973833385258	0.899	0.761	1	1	IER5
CTSB	0.00688976434567202	0.787141353398857	0.65	0.833	1	1	CTSB
MT2A	0.00729639320257869	0.275648872994387	0.996	0.87	1	1	MT2A
FNDC1	0	1.09817093925825	1	0.785	0	2	FNDC1
WWTR1	0	0.874266745881805	0.999	0.817	0	2	WWTR1
EFNB2	0	0.318199995473878	0.975	0.785	0	2	EFNB2
CRABP2	1.40471194784774e-292	0.870867976469951	0.993	0.831	2.80942389569548e-289	2	CRABP2
BHLHE41	1.41491740987685e-289	0.628298437969089	0.997	0.812	2.8298348197537e-286	2	BHLHE41
ECM1	1.59408040500925e-287	0.694816489749797	0.979	0.801	3.18816081001849e-284	2	ECM1
LMO4	1.69583790463108e-275	0.745118718309726	0.984	0.674	3.39167580926216e-272	2	LMO4
APOD	2.2143695219978e-272	1.14438895898217	1	0.863	4.4287390439956e-269	2	APOD
CLDN1	3.12142453543437e-271	0.721610421049796	0.941	0.656	6.24284907086875e-268	2	CLDN1
CGNL1	2.92622438126481e-270	0.251963406211212	0.969	0.727	5.85244876252961e-267	2	CGNL1
ANKH	8.82984529692397e-269	0.847620082813031	0.995	0.849	1.76596905938479e-265	2	ANKH
COL6A2	1.73408826078106e-267	0.814740118641359	1	0.899	3.46817652156212e-264	2	COL6A2
OLFML2B	3.08756921092965e-265	0.838821662549557	0.97	0.723	6.1751384218593e-262	2	OLFML2B
COL6A1	2.57457321178925e-255	0.813520746230295	0.998	0.881	5.1491464235785e-252	2	COL6A1
FOXS1	1.70810939683676e-252	0.732664631192267	0.974	0.798	3.41621879367353e-249	2	FOXS1
KIAA1755	6.5315107744796e-252	0.463297340077908	0.951	0.749	1.30630215489592e-248	2	KIAA1755
STRA6	3.52167106099613e-250	0.426583703557412	0.979	0.719	7.04334212199226e-247	2	STRA6
FGD5	3.69036679496571e-250	0.481279784505334	0.927	0.61	7.38073358993141e-247	2	FGD5
CH25H	4.5657762744182e-247	0.349187501730926	0.911	0.585	9.1315525488364e-244	2	CH25H
MRAS	5.80671544571051e-229	0.489224817657526	0.968	0.774	1.1613430891421e-225	2	MRAS
ESM1	5.78580577540138e-225	0.511015998276392	0.982	0.745	1.15716115508028e-221	2	ESM1
GSN	2.65226153238735e-222	0.791232065916787	1	0.905	5.3045230647747e-219	2	GSN
OAF1	5.08711623207743e-217	0.434514538829812	0.945	0.736	1.01742324641549e-213	2	OAF
COL3A11	2.75350619313077e-214	0.761581527483365	1	0.917	5.50701238626155e-211	2	COL3A1
SPON1	3.52916811507383e-214	0.510422075554239	0.948	0.7	7.05833623014766e-211	2	SPON1
RBP11	6.55368463755657e-213	0.816108818051322	0.984	0.767	1.31073692751131e-209	2	RBP1
NR4A2	3.18064584853018e-212	0.671590669180629	0.973	0.73	6.36129169706035e-209	2	NR4A2
PCOLCE	4.56041190007204e-210	0.586247607171907	0.993	0.858	9.12082380014408e-207	2	PCOLCE
TENM2	7.13791294991776e-207	0.57675623807389	0.89	0.672	1.42758258998355e-203	2	TENM2
CFI	1.61667143138729e-205	0.472368209883747	0.938	0.724	3.23334286277457e-202	2	CFI
RGS3	2.31541150525482e-205	0.413409009575705	0.99	0.842	4.63082301050965e-202	2	RGS3
MFAP2	3.57617011392932e-205	0.525985782162656	0.923	0.658	7.15234022785863e-202	2	MFAP2
MDK1	7.45659094249966e-203	0.382661342492747	0.989	0.651	1.49131818849993e-199	2	MDK
SERPINH1	2.5843268282743e-202	0.624474090315369	0.998	0.859	5.1686536565486e-199	2	SERPINH1
AKR1C3	6.83604828471554e-198	0.472532053216924	0.957	0.706	1.36720965694311e-194	2	AKR1C3
COL1A11	1.0346355977634e-194	0.513307027252474	1	0.912	2.0692711955268e-191	2	COL1A1
MARCKSL1	2.61465788520496e-192	0.548368513829167	0.934	0.692	5.22931577040991e-189	2	MARCKSL1
MMP28	9.76326654911564e-192	0.367304688062004	0.975	0.68	1.95265330982313e-188	2	MMP28
PGF	1.65056205376375e-190	0.438544690251644	0.968	0.79	3.30112410752751e-187	2	PGF
ENC1	1.98304809320759e-189	0.26941532122465	0.956	0.721	3.96609618641517e-186	2	ENC1
P2RY14	2.90823074159545e-187	0.447875593079415	0.947	0.746	5.8164614831909e-184	2	P2RY14
DPYSL3	4.74385805679371e-182	0.39171375899939	0.976	0.749	9.48771611358742e-179	2	DPYSL3
MGP1	6.132439066905e-181	0.737963468739985	1	0.92	1.226487813381e-177	2	MGP
PPP3CA	8.34059993266386e-181	0.447733793258335	0.974	0.773	1.66811998653277e-177	2	PPP3CA
COL18A1	9.00587799459436e-181	0.41520381142142	0.986	0.828	1.80117559891887e-177	2	COL18A1
PKDCC	8.79184283021859e-177	0.506099656196099	0.909	0.638	1.75836856604372e-173	2	PKDCC
CLDN111	1.57953492899144e-176	0.427211721737465	0.996	0.823	3.15906985798288e-173	2	CLDN11
CYP1B1	2.1051387403134e-175	0.589507713234918	0.978	0.79	4.21027748062679e-172	2	CYP1B1
GPC1	1.34610225886523e-174	0.517329943470967	0.904	0.746	2.69220451773045e-171	2	GPC1
RCN3	1.7390054235667e-171	0.468405305906865	0.997	0.847	3.47801084713339e-168	2	RCN3
ALDH1A3	5.07263761006842e-171	0.728999743407329	0.92	0.696	1.01452752201368e-167	2	ALDH1A3
SOX41	8.63391063306053e-171	0.511032338741885	0.993	0.752	1.7267821266121e-167	2	SOX4
TSHZ2	4.13912527446897e-163	0.434106287092248	0.911	0.702	8.27825054893794e-160	2	TSHZ2
BICC1	3.44405844296742e-161	0.405830278367199	0.968	0.737	6.88811688593483e-158	2	BICC1
ELN	3.18382336501347e-160	0.376262807666195	0.954	0.745	6.36764673002693e-157	2	ELN
NPC21	6.03019468252737e-160	0.500110040082184	0.997	0.869	1.20603893650547e-156	2	NPC2
ATP13A2	2.44288846071422e-159	0.365253345779807	0.884	0.554	4.88577692142843e-156	2	ATP13A2
LEF1	4.17660703523379e-159	0.43464127635839	0.937	0.648	8.35321407046758e-156	2	LEF1
RHOJ	2.53702032666525e-158	0.265390402046429	0.943	0.704	5.0740406533305e-155	2	RHOJ
MATN2	2.82449051980664e-156	0.421921294993853	0.865	0.608	5.64898103961328e-153	2	MATN2
ARL4C1	3.62594243809481e-156	0.498889101941025	0.998	0.891	7.25188487618962e-153	2	ARL4C
PHGDH	8.2115415047865e-156	0.468150178970297	0.816	0.574	1.6423083009573e-152	2	PHGDH
SLC29A1	1.50639545354763e-155	0.43840730453165	0.945	0.728	3.01279090709526e-152	2	SLC29A1
PTCH1	2.2442602568484e-155	0.496658650704431	0.899	0.683	4.4885205136968e-152	2	PTCH1
ZFAND2A	8.8909417293757e-155	0.33723271960913	0.988	0.867	1.77818834587514e-151	2	ZFAND2A
ABCA8	2.72164028107847e-154	0.397036562073682	0.877	0.595	5.44328056215694e-151	2	ABCA8
TSC22D1	1.45490387428202e-153	0.469635227501219	0.997	0.812	2.90980774856404e-150	2	TSC22D1
TCF4	5.47395751354787e-151	0.395728115543552	0.976	0.835	1.09479150270957e-147	2	TCF4
DIRAS3	2.46815125220021e-149	0.328080440686892	0.837	0.584	4.93630250440042e-146	2	DIRAS3
CTSK1	6.36669180932124e-149	0.255169509506938	0.986	0.695	1.27333836186425e-145	2	CTSK
COL15A11	6.04771635169967e-145	0.40534148063568	0.978	0.855	1.20954327033993e-141	2	COL15A1
PLAC9	1.32668000804626e-144	0.424768613767182	0.984	0.833	2.65336001609252e-141	2	PLAC9
CCND2	3.38316175483502e-144	0.288332959555753	0.968	0.798	6.76632350967005e-141	2	CCND2
HSPA51	3.64634804632862e-144	0.51133582559898	0.993	0.883	7.29269609265724e-141	2	HSPA5
IGFBP6	1.8584271044672e-142	0.652820049152877	0.996	0.843	3.7168542089344e-139	2	IGFBP6
MEG3	2.85533696117844e-142	0.348019691076711	0.959	0.807	5.71067392235688e-139	2	MEG3
HSPH11	5.61678269209279e-141	0.418408758229405	0.995	0.811	1.12335653841856e-137	2	HSPH1
EGR2	3.43144468730042e-140	0.391531166032817	0.904	0.618	6.86288937460084e-137	2	EGR2
COL1A21	6.11234559518059e-138	0.419504312755713	1	0.936	1.22246911903612e-134	2	COL1A2
LUM1	3.74282588477052e-137	0.563208223256695	1	0.859	7.48565176954103e-134	2	LUM
SDC2	1.1689388686358e-134	0.337020172512051	0.987	0.789	2.3378777372716e-131	2	SDC2
LAMA2	1.28447413915335e-134	0.350834556497298	0.884	0.708	2.56894827830669e-131	2	LAMA2
LTBP21	5.05098731496552e-134	0.395447792872443	0.996	0.826	1.0101974629931e-130	2	LTBP2
GPC3	8.39471244513847e-134	0.543946664947767	0.859	0.63	1.67894248902769e-130	2	GPC3
TIMP11	1.25837469609782e-132	0.538497835865015	1	0.958	2.51674939219564e-129	2	TIMP1
HILPDA	1.1617432959668e-131	0.311624115988008	0.991	0.927	2.32348659193359e-128	2	HILPDA
SFRP41	1.58181311274215e-131	0.466833164872917	0.99	0.775	3.1636262254843e-128	2	SFRP4
ID3	3.66567847259593e-131	0.657503531193413	0.998	0.864	7.33135694519185e-128	2	ID3
THBD	9.80312966264431e-131	0.49359371308466	0.833	0.623	1.96062593252886e-127	2	THBD
SCUBE3	3.10801394123082e-130	0.637759631450497	0.77	0.625	6.21602788246164e-127	2	SCUBE3
REL	2.22663231074005e-129	0.315742866219146	0.919	0.646	4.45326462148009e-126	2	REL
ETV1	5.4112198497356e-128	0.30735949709405	0.98	0.832	1.08224396994712e-124	2	ETV1
PGM2L1	2.16364041498816e-127	0.359142487241759	0.94	0.699	4.32728082997632e-124	2	PGM2L1
GUCY1A1	2.66068214125789e-125	0.388983422122402	0.904	0.738	5.32136428251578e-122	2	GUCY1A1
EMCN	2.81125745542077e-125	0.251688465082321	0.91	0.765	5.62251491084155e-122	2	EMCN
SPON21	9.48414994748493e-125	0.332497905375662	0.956	0.738	1.89682998949699e-121	2	SPON2
VCAN2	8.64660393970543e-124	0.442162671193808	0.992	0.826	1.72932078794109e-120	2	VCAN
APOE	5.83735595696427e-123	0.293073738128573	0.971	0.879	1.16747119139285e-119	2	APOE
TWIST1	6.08925595001397e-123	0.31461428073134	0.891	0.682	1.21785119000279e-119	2	TWIST1
CRISPLD21	3.45671566880185e-121	0.257860896455467	0.884	0.527	6.9134313376037e-118	2	CRISPLD2
DIO2	2.36408132118442e-118	0.487306308241459	0.948	0.76	4.72816264236884e-115	2	DIO2
LTBP4	1.21084611080423e-115	0.388900244076846	0.904	0.718	2.42169222160845e-112	2	LTBP4
HEYL	7.71335391673227e-113	0.405823588653451	0.866	0.811	1.54267078334645e-109	2	HEYL
FOXC2	1.64076353304354e-112	0.373214947918226	0.929	0.716	3.28152706608708e-109	2	FOXC2
COLEC12	7.69896889698041e-112	0.320364083837227	0.843	0.616	1.53979377939608e-108	2	COLEC12
S1PR3	3.29120391709951e-111	0.319209794639585	0.856	0.63	6.58240783419902e-108	2	S1PR3
FGFR1	5.2656293719058e-111	0.299116897710873	0.944	0.719	1.05312587438116e-107	2	FGFR1
ABL2	1.21681477063528e-110	0.338097227401214	0.91	0.675	2.43362954127056e-107	2	ABL2
JAG1	1.28583773582009e-110	0.255722832491954	0.948	0.796	2.57167547164019e-107	2	JAG1
FSCN1	7.07067982142259e-110	0.259422496244961	0.827	0.696	1.41413596428452e-106	2	FSCN1
TENT5A	7.77424426663831e-110	0.386825245604367	0.943	0.808	1.55484885332766e-106	2	TENT5A
CLEC11A	1.3684377553838e-109	0.330042577335021	0.943	0.81	2.7368755107676e-106	2	CLEC11A
IL32	2.79571806958716e-108	0.342620951408965	0.984	0.752	5.59143613917433e-105	2	IL32
NRXN2	4.75490421504694e-106	0.339429585284511	0.743	0.492	9.50980843009387e-103	2	NRXN2
DNAJB1	8.089788673252e-105	0.400717201255289	0.995	0.844	1.6179577346504e-101	2	DNAJB1
MEST	8.02065541599978e-104	0.327586429968104	0.879	0.709	1.60413108319996e-100	2	MEST
COL16A11	6.68218448630306e-103	0.344284527195827	0.879	0.659	1.33643689726061e-99	2	COL16A1
HSPA1B	1.71621724382239e-101	0.377682561017215	0.998	0.834	3.43243448764479e-98	2	HSPA1B
CRIP2	2.31321654720933e-100	0.274113859049641	0.957	0.746	4.62643309441867e-97	2	CRIP2
COTL1	1.03761774232396e-99	0.25445381840989	0.91	0.783	2.07523548464791e-96	2	COTL1
IER5L	1.49519513659604e-97	0.323054639399396	0.966	0.806	2.99039027319207e-94	2	IER5L
PDLIM3	1.40377109557315e-96	0.400943413787962	0.951	0.854	2.80754219114631e-93	2	PDLIM3
NR2F2	8.82395944780919e-96	0.319090559869092	0.996	0.845	1.76479188956184e-92	2	NR2F2
FBLN11	1.77487413599879e-95	0.255487402206013	0.995	0.741	3.54974827199759e-92	2	FBLN1
ID1	2.88897660426853e-95	0.402073374351916	0.957	0.701	5.77795320853707e-92	2	ID1
TCN2	1.9375742360203e-92	0.311742579452111	0.81	0.652	3.8751484720406e-89	2	TCN2
PDLIM7	2.31181024904444e-92	0.272907478777629	0.957	0.794	4.62362049808889e-89	2	PDLIM7
ATP1B3	1.89701429366718e-91	0.36636453515171	0.836	0.541	3.79402858733436e-88	2	ATP1B3
IGFBP41	3.66266584933482e-91	0.35339366228077	0.997	0.858	7.32533169866964e-88	2	IGFBP4
A4GALT	4.02498135225935e-90	0.294639269022739	0.869	0.653	8.0499627045187e-87	2	A4GALT
KLF5	1.67152727635062e-88	0.351108554867566	0.802	0.674	3.34305455270123e-85	2	KLF5
MEDAG1	4.01609217620207e-87	0.289534270150545	0.748	0.594	8.03218435240414e-84	2	MEDAG
TMEM100	5.69669295709945e-86	0.42346017915366	0.788	0.679	1.13933859141989e-82	2	TMEM100
TMEM158	5.2013377732985e-84	0.319617660092442	0.84	0.726	1.0402675546597e-80	2	TMEM158
TGFBI	8.56799258357205e-84	0.297546059326642	0.952	0.839	1.71359851671441e-80	2	TGFBI
C11orf96	3.66622197860103e-82	0.365027913276753	0.991	0.824	7.33244395720205e-79	2	C11orf96
AC116345.1	1.47237894803707e-75	0.260881911814679	0.684	0.493	2.94475789607415e-72	2	AC116345.1
GAP43	1.75336365738026e-73	0.420811275949939	0.815	0.655	3.50672731476052e-70	2	GAP43
KLF61	1.40671588383269e-69	0.27552296067514	0.938	0.697	2.81343176766538e-66	2	KLF6
EGR3	3.08202818319889e-69	0.340147582983419	0.747	0.592	6.16405636639778e-66	2	EGR3
IFI27	5.99586471632422e-69	0.499117672021412	0.973	0.705	1.19917294326484e-65	2	IFI27
GEM	2.89949609292758e-66	0.267294034643189	0.909	0.817	5.79899218585515e-63	2	GEM
KLF2	1.62105371465365e-59	0.262085695317274	0.877	0.752	3.2421074293073e-56	2	KLF2
SCN7A	6.42800627766045e-58	0.319888618815262	0.691	0.663	1.28560125553209e-54	2	SCN7A
CCL261	2.31119741745046e-57	0.307972775915656	0.912	0.759	4.62239483490092e-54	2	CCL26
AKR1C1	8.88302106634689e-52	0.255673531536889	0.731	0.592	1.77660421326938e-48	2	AKR1C1
DCX	1.069500293269e-39	0.25511396161548	0.63	0.575	2.13900058653801e-36	2	DCX
MFAP51	4.1285264627457e-29	0.306233489833559	0.753	0.789	8.25705292549139e-26	2	MFAP5
MIA	1.98379431762292e-19	0.371687312574763	0.693	0.733	3.96758863524584e-16	2	MIA
CYTL1	5.57774613196748e-17	0.533223466833614	0.624	0.68	1.11554922639349e-13	2	CYTL1
TNC	7.78828112475468e-07	0.252257494759978	0.595	0.582	0.00155765622495094	2	TNC
PI16	1.38040528113776e-06	0.429236090011822	0.514	0.315	0.00276081056227552	2	PI16
PLTP	1.28445036268055e-47	0.250817604643929	0.553	0.842	2.5689007253611e-44	3	PLTP
TPD52L1	2.182846696135e-38	0.302247451912514	0.716	0.659	4.36569339226999e-35	3	TPD52L1
KRT8	7.64207226564802e-37	0.352244581915323	0.617	0.849	1.5284144531296e-33	3	KRT8
COL10A11	2.09121673457285e-35	0.454644451915714	0.476	0.701	4.18243346914569e-32	3	COL10A1
CCND1	1.08890097553728e-30	0.297737233505447	0.706	0.841	2.17780195107456e-27	3	CCND1
HES1	1.7513832238842e-27	0.256772139947555	0.535	0.729	3.5027664477684e-24	3	HES1
S100B	1.88034826385243e-25	0.347761033447798	0.545	0.456	3.76069652770485e-22	3	S100B
CP	5.51253991958345e-24	0.310225612162087	0.825	0.849	1.10250798391669e-20	3	CP
PTGDS	9.65464960618349e-24	0.673704518472768	0.852	0.858	1.9309299212367e-20	3	PTGDS
MGST11	2.60888701338531e-22	0.365220644709455	0.813	0.754	5.21777402677062e-19	3	MGST1
NRP1	5.23677938397731e-22	0.332826752937521	0.499	0.745	1.04735587679546e-18	3	NRP1
ITGBL11	6.86574979623689e-21	0.274575347323244	0.539	0.805	1.37314995924738e-17	3	ITGBL1
ANGPTL4	3.42420700447355e-19	0.255492943009191	0.641	0.851	6.8484140089471e-16	3	ANGPTL4
MATN31	3.5303838960056e-19	0.298111099115611	0.26	0.439	7.06076779201121e-16	3	MATN3
KRT18	3.13203305581175e-17	0.465727645865115	0.709	0.872	6.26406611162349e-14	3	KRT18
C71	6.16037179094311e-15	0.418764785718633	0.642	0.799	1.23207435818862e-11	3	C7
MT1X	7.99976319323356e-14	0.382803554873349	0.415	0.64	1.59995263864671e-10	3	MT1X
TM4SF11	8.33376230329387e-12	0.257998595394742	0.592	0.805	1.66675246065877e-08	3	TM4SF1
MT2A1	6.82622126487338e-11	0.665168488076522	0.781	0.906	1.36524425297468e-07	3	MT2A
SFRP11	2.4252854131106e-10	0.441250149671091	0.464	0.58	4.8505708262212e-07	3	SFRP1
SERPINF11	5.65344767475333e-10	0.451655779507689	0.67	0.834	1.13068953495067e-06	3	SERPINF1
COL2A1	7.58328864793805e-10	0.280661806044665	0.746	0.819	1.51665772958761e-06	3	COL2A1
C2orf40	8.20527087366811e-10	0.499411323232248	0.622	0.818	1.64105417473362e-06	3	C2orf40
PRELP1	1.70453106140755e-09	0.353971561820662	0.649	0.876	3.4090621228151e-06	3	PRELP
ADH1B	7.11606396238761e-09	0.262959588498662	0.662	0.693	1.42321279247752e-05	3	ADH1B
SFRP21	7.72877290984665e-09	0.310093096012392	0.587	0.782	1.54575458196933e-05	3	SFRP2
RGS1	1.37652340162318e-08	0.303199805390284	0.57	0.542	2.75304680324636e-05	3	RGS1
CA3	6.3390341950896e-08	0.289349499869226	0.569	0.587	0.000126780683901792	3	CA3
ISG151	1.13103724383455e-07	0.547668186585634	0.644	0.738	0.000226207448766909	3	ISG15
CFH2	1.56235716531885e-07	0.310116773915247	0.719	0.886	0.000312471433063769	3	CFH
F3	4.84704161079076e-07	0.29829968670689	0.533	0.721	0.000969408322158152	3	F3
AEBP11	1.66939765155049e-06	0.317264861321761	0.709	0.885	0.00333879530310097	3	AEBP1
TTR	3.41362849195106e-06	1.81403865827077	0.729	0.776	0.00682725698390211	3	TTR
CCDC801	3.9461374751432e-06	0.253509053850222	0.675	0.836	0.0078922749502864	3	CCDC80
CST1	6.7023800263865e-06	0.906178144233438	0.293	0.438	0.013404760052773	3	CST1
DPEP11	2.75905108828448e-05	0.408688964980874	0.384	0.529	0.0551810217656896	3	DPEP1
MT1E	3.09373276465039e-05	0.505629506527013	0.486	0.745	0.0618746552930078	3	MT1E
CD24	0.000170870679497522	0.270632995958968	0.513	0.652	0.341741358995044	3	CD24
ACAN	0.00023125905072917	0.479414157833093	0.74	0.861	0.462518101458339	3	ACAN
IFIT3	0.000288790836114465	0.269290266793256	0.407	0.435	0.577581672228931	3	IFIT3
CXCR4	0.000407414257223078	0.290360688192518	0.438	0.454	0.814828514446157	3	CXCR4
IBSP	0.00111429481930342	0.32428722124415	0.107	0.28	1	3	IBSP
KRT13	0.00125536385009277	0.252430608230088	0.827	0.942	1	3	KRT13
SFRP42	0.00201875247421489	0.460395986702506	0.682	0.819	1	3	SFRP4
SOD2	0.00489921327575874	0.264815798940574	0.747	0.733	1	3	SOD2
IFIT1	0.00609887722370606	0.374130372108486	0.393	0.555	1	3	IFIT1
S100A10	0.00719324113424701	0.28459046791731	0.845	0.886	1	3	S100A10
TXNIP1	0.00857305582414336	0.290328653184214	0.526	0.697	1	3	TXNIP
TF	2.23405556685071e-290	2.77417932886914	0.918	0.917	4.46811113370141e-287	4	TF
NPVF	1.87732621293051e-238	2.88268631339532	0.86	0.783	3.75465242586101e-235	4	NPVF
CP1	6.55763083121553e-161	1.88985090247154	0.839	0.847	1.31152616624311e-157	4	CP
RCVRN	2.73393397424198e-151	2.1334788379493	0.758	0.693	5.46786794848396e-148	4	RCVRN
GAPDH	3.32901070983403e-145	1.17351593669201	0.979	0.982	6.65802141966807e-142	4	GAPDH
CRABP1	7.37541582215615e-141	2.00543009594184	0.775	0.832	1.47508316443123e-137	4	CRABP1
GPX3	7.8418321869739e-139	1.53531296691845	0.793	0.659	1.56836643739478e-135	4	GPX3
APOE1	8.98479122775217e-124	1.59196625697126	0.894	0.891	1.79695824555043e-120	4	APOE
TUBB2B	2.39461324997947e-122	1.18585134115925	0.725	0.55	4.78922649995895e-119	4	TUBB2B
PDE6H	2.67492687837598e-99	1.85174827979705	0.692	0.616	5.34985375675196e-96	4	PDE6H
SPP1	7.58558842222739e-99	1.53715256289954	0.907	0.954	1.51711768444548e-95	4	SPP1
APOC1	1.77582911740068e-97	1.23013346603153	0.713	0.622	3.55165823480136e-94	4	APOC1
GNGT1	2.64680956929999e-97	1.79820240962865	0.712	0.767	5.29361913859998e-94	4	GNGT1
TMEM176A1	9.9636821290165e-87	0.626884175972187	0.631	0.393	1.9927364258033e-83	4	TMEM176A
CLU	3.2120313775401e-85	1.67835091908389	0.83	0.794	6.4240627550802e-82	4	CLU
LGALS3	5.93578343817507e-82	1.46931227410152	0.896	0.896	1.18715668763501e-78	4	LGALS3
GPM6B	7.17154486992105e-79	1.54195430686697	0.658	0.516	1.43430897398421e-75	4	GPM6B
MT1F	4.4666613274394e-76	0.434278300374508	0.704	0.74	8.9333226548788e-73	4	MT1F
PTTG1	3.71401377893059e-74	0.252241774289551	0.686	0.561	7.42802755786117e-71	4	PTTG1
AKAP12	2.04184649538741e-73	1.39840323780329	0.846	0.868	4.08369299077483e-70	4	AKAP12
NCAM1	2.71533919922641e-70	0.600059321469495	0.694	0.678	5.43067839845282e-67	4	NCAM1
TSPAN13	4.21370845908046e-69	0.490502346891141	0.366	0.895	8.42741691816093e-66	4	TSPAN13
CHI3L1	2.55013797192321e-67	1.43634880588442	0.718	0.769	5.10027594384641e-64	4	CHI3L1
WIF1	1.90690036890677e-63	1.03815226011432	0.672	0.701	3.81380073781354e-60	4	WIF1
TSPAN8	8.59412623434737e-63	0.345613551578093	0.239	0.608	1.71882524686947e-59	4	TSPAN8
MARCKSL11	1.98855743641527e-62	0.275282397423009	0.359	0.769	3.97711487283054e-59	4	MARCKSL1
NR2F1	6.3246046222288e-58	0.272505943657023	0.569	0.832	1.26492092444576e-54	4	NR2F1
COL2A11	1.1044357082882e-55	0.36787869537266	0.713	0.823	2.20887141657639e-52	4	COL2A1
GPM6A	2.3310670187784e-55	0.546452755965715	0.681	0.788	4.6621340375568e-52	4	GPM6A
CKB	7.47779043317706e-55	1.63825697842725	0.671	0.576	1.49555808663541e-51	4	CKB
HIST1H1C1	1.28271144575833e-51	0.547996684612274	0.676	0.709	2.56542289151666e-48	4	HIST1H1C
ICAM1	5.54453115762795e-50	0.308238385381324	0.676	0.536	1.10890623152559e-46	4	ICAM1
SYT1	1.13215572090722e-49	0.961451118942507	0.634	0.66	2.26431144181445e-46	4	SYT1
MGARP	6.88394986146584e-48	0.56750416044231	0.678	0.752	1.37678997229317e-44	4	MGARP
FRZB	3.60195548592026e-46	1.25725866004369	0.797	0.79	7.20391097184052e-43	4	FRZB
TSPAN7	8.58239423790102e-46	0.629043383087919	0.619	0.541	1.7164788475802e-42	4	TSPAN7
CRYAB	1.85511265359206e-44	1.36783410728197	0.852	0.911	3.71022530718411e-41	4	CRYAB
FTL1	6.68553523501184e-43	0.436584653543723	0.991	0.997	1.33710704700237e-39	4	FTL
PTN	7.65575262779099e-42	1.77704195264917	0.73	0.754	1.5311505255582e-38	4	PTN
RNASE1	3.66486995298412e-41	0.383392759492579	0.247	0.585	7.32973990596824e-38	4	RNASE1
ARL4D1	2.9294696721555e-39	0.722800083595332	0.634	0.5	5.85893934431101e-36	4	ARL4D
CADM1	2.99309275123301e-38	1.01387869788089	0.654	0.697	5.98618550246603e-35	4	CADM1
PCSK1N	2.81999878007513e-36	0.731862629261126	0.511	0.868	5.63999756015027e-33	4	PCSK1N
DAPL1	3.58826588199239e-34	0.466553256209419	0.6	0.633	7.17653176398477e-31	4	DAPL1
CRYM	3.67088665878425e-33	0.462654571490184	0.265	0.492	7.3417733175685e-30	4	CRYM
PPP1R3C	6.10161469473153e-33	0.37595172306921	0.696	0.847	1.22032293894631e-29	4	PPP1R3C
PEG10	6.84191193395932e-30	0.319346513553346	0.683	0.742	1.36838238679186e-26	4	PEG10
CXCL141	5.85245078938016e-26	0.309069330547057	0.165	0.531	1.17049015787603e-22	4	CXCL14
MT3	7.10787925160233e-23	0.998005706558022	0.568	0.678	1.42157585032047e-19	4	MT3
SNCG	4.39391265167977e-22	0.722610327610104	0.677	0.778	8.78782530335954e-19	4	SNCG
PTGDS1	4.12041056144303e-21	0.872275050355297	0.86	0.857	8.24082112288607e-18	4	PTGDS
FLT1	1.30904283362586e-19	0.357754105415363	0.593	0.593	2.61808566725172e-16	4	FLT1
PCP4	1.53857121816043e-19	0.865640881252341	0.592	0.757	3.07714243632087e-16	4	PCP4
CBR1	3.80629544357205e-19	0.300849489347043	0.404	0.68	7.61259088714409e-16	4	CBR1
TCEAL2	5.35109546190671e-19	0.902140882485354	0.534	0.578	1.07021909238134e-15	4	TCEAL2
FBXO2	9.85356425386042e-19	0.816183468587638	0.449	0.397	1.97071285077208e-15	4	FBXO2
MT1G	3.78198525086062e-18	0.392499187006992	0.574	0.649	7.56397050172125e-15	4	MT1G
HIST1H4C	5.58095402436231e-17	0.621091480929406	0.346	0.63	1.11619080487246e-13	4	HIST1H4C
NDUFA4L2	7.81605315171983e-16	0.703455493102311	0.802	0.905	1.56321063034397e-12	4	NDUFA4L2
PON21	9.56115937845452e-16	0.254674712845471	0.613	0.821	1.9122318756909e-12	4	PON2
SBSPON	6.45485780243535e-15	0.30201046542284	0.541	0.525	1.29097156048707e-11	4	SBSPON
GLUL	1.1004648987773e-14	1.12903462827411	0.716	0.776	2.2009297975546e-11	4	GLUL
KRT181	2.50658064051092e-14	0.454838903567691	0.514	0.896	5.01316128102185e-11	4	KRT18
MPZL2	2.96698954278949e-14	0.273900898781576	0.304	0.499	5.93397908557898e-11	4	MPZL2
PKIB	7.29688154270652e-14	0.552906210246725	0.53	0.683	1.4593763085413e-10	4	PKIB
HBB	9.22816498921977e-14	1.24682908901938	0.176	0.386	1.84563299784395e-10	4	HBB
TMEM176B1	1.24861398480368e-13	0.455966826452815	0.366	0.332	2.49722796960737e-10	4	TMEM176B
CA31	2.00639651195e-12	0.308237971346736	0.376	0.611	4.01279302389999e-09	4	CA3
DOC2B	6.70110501294587e-12	0.303593149672309	0.45	0.446	1.34022100258917e-08	4	DOC2B
KRT81	9.22966422520183e-12	0.535948499351711	0.542	0.858	1.84593284504037e-08	4	KRT8
CD741	1.32008015338865e-11	0.391667262900015	0.507	0.503	2.64016030677729e-08	4	CD74
ODC1	1.94442204094571e-11	0.351986763477954	0.546	0.74	3.88884408189142e-08	4	ODC1
ANGPTL41	3.32209780680589e-11	0.501287331247139	0.707	0.842	6.64419561361177e-08	4	ANGPTL4
HBA2	4.14659381727318e-11	0.354519427686141	0.287	0.436	8.29318763454637e-08	4	HBA2
ALDH1A11	6.46879634477185e-10	0.374084344775289	0.193	0.452	1.29375926895437e-06	4	ALDH1A1
ANXA3	2.19261776372518e-09	0.314700172413214	0.553	0.717	4.38523552745036e-06	4	ANXA3
EPCAM	2.90216157218015e-09	0.709175697282765	0.275	0.441	5.8043231443603e-06	4	EPCAM
S100A1	7.64243252743297e-09	1.14964740092773	0.457	0.542	1.52848650548659e-05	4	S100A1
CA2	1.0783177165539e-08	1.23723822702058	0.493	0.444	2.1566354331078e-05	4	CA2
MAP1B	1.77615749840304e-08	0.687620277079229	0.731	0.804	3.55231499680608e-05	4	MAP1B
HMGB2	3.71742492109846e-08	0.259209092150733	0.701	0.844	7.43484984219691e-05	4	HMGB2
HLA-DRB1	6.02322342404346e-08	0.260190336829389	0.493	0.523	0.000120464468480869	4	HLA-DRB1
SCRG1	4.54139148298721e-07	0.572609852602391	0.685	0.808	0.000908278296597442	4	SCRG1
CAV1	5.03718073904259e-07	0.358463011575726	0.763	0.886	0.00100743614780852	4	CAV1
CSRP2	5.87293341486105e-07	0.606362080634051	0.499	0.718	0.00117458668297221	4	CSRP2
UCMA	7.65511980718504e-07	0.25143563456541	0.264	0	0.00153102396143701	4	UCMA
PDPN1	8.66441691984848e-07	0.447944012904099	0.543	0.572	0.0017328833839697	4	PDPN
ARL6IP1	1.56536318462024e-06	0.539595487403709	0.623	0.775	0.00313072636924048	4	ARL6IP1
SELENOP1	1.68253760209839e-06	0.313743872714883	0.356	0.566	0.00336507520419679	4	SELENOP
DIO3	3.15251845794511e-06	0.265898262258105	0.539	0.514	0.00630503691589022	4	DIO3
CLDN3	4.02750857107424e-06	0.281841114191078	0.362	0.33	0.00805501714214848	4	CLDN3
VEGFA	1.35852973864383e-05	0.527550959834746	0.634	0.848	0.0271705947728766	4	VEGFA
MGST12	3.62312055939205e-05	0.302567171124243	0.62	0.778	0.072462411187841	4	MGST1
SEPT4	4.72242769846907e-05	0.308061085119712	0.42	0.427	0.0944485539693813	4	SEPT4
TFPI2	8.11063726428815e-05	0.37145400545149	0.671	0.922	0.162212745285763	4	TFPI2
SLN	9.56580476496838e-05	0.276099189125987	0.555	0.696	0.191316095299368	4	SLN
KRT19	0.00010472887590482	0.768778712058908	0.705	0.943	0.209457751809641	4	KRT19
MAL	0.000197103854218784	0.309973683058946	0.499	0.562	0.394207708437568	4	MAL
NRN1	0.000242014445985941	0.330106231780893	0.332	0.343	0.484028891971883	4	NRN1
WFDC2	0.000262228010776343	0.972840604379944	0.408	0.59	0.524456021552686	4	WFDC2
KRT131	0.00037118751917068	0.397892816527818	0.734	0.954	0.74237503834136	4	KRT13
DDIT3	0.000780322278244684	0.848231416074726	0.798	0.894	1	4	DDIT3
KCNMA1	0.000829905047270725	0.458388431467296	0.488	0.559	1	4	KCNMA1
DCLK1	0.00102491024060704	0.269470391795639	0.456	0.588	1	4	DCLK1
TUBA1B	0.00125535709989812	0.464019188166944	0.77	0.929	1	4	TUBA1B
TESC	0.00139923015767263	0.293761894950071	0.386	0.456	1	4	TESC
CPE	0.00157376216648888	0.718679892900882	0.539	0.785	1	4	CPE
STMN1	0.00181924649957303	0.912695855354242	0.505	0.625	1	4	STMN1
S100A101	0.00202057974801628	0.499578132877294	0.739	0.9	1	4	S100A10
SLC2A11	0.00212501052916825	0.38226194275069	0.699	0.861	1	4	SLC2A1
AIF1L	0.00218467703930094	0.425828490077807	0.502	0.67	1	4	AIF1L
CHPF	0.00522615058969122	0.253664255173045	0.674	0.795	1	4	CHPF
BEX1	0.00541246594344462	0.996520703903809	0.462	0.785	1	4	BEX1
SEZ6L2	0.00767422646720693	0.272463589742564	0.565	0.846	1	4	SEZ6L2
TUBB2A	0.0099862852531196	0.581245315294052	0.694	0.721	1	4	TUBB2A
RGS5	0	2.74303980352126	0.97	0.619	0	5	RGS5
MCAM	0	1.90420140251764	0.954	0.6	0	5	MCAM
PTP4A3	0	1.62874662438861	0.968	0.558	0	5	PTP4A3
ACTG2	0	1.50108905704718	0.962	0.599	0	5	ACTG2
ANGPT2	0	1.15523882683782	0.939	0.328	0	5	ANGPT2
ACTC1	0	0.515719168559722	0.9	0.362	0	5	ACTC1
CASQ2	2.84832751608976e-304	0.855079814642582	0.914	0.54	5.69665503217953e-301	5	CASQ2
TBX2	1.62819242682176e-284	1.01087498279021	0.929	0.299	3.25638485364352e-281	5	TBX2
PLN	4.34905509669565e-276	1.22273515657392	0.92	0.702	8.6981101933913e-273	5	PLN
TSPAN12	2.89775441742894e-272	0.489253793664402	0.901	0.497	5.79550883485789e-269	5	TSPAN12
MYH11	3.96603012149217e-267	1.32102512598216	0.898	0.417	7.93206024298433e-264	5	MYH11
COL18A11	4.41656431919127e-260	1.52483879376687	0.97	0.836	8.83312863838254e-257	5	COL18A1
KCNJ8	2.1841087166991e-258	1.00291632012402	0.907	0.596	4.3682174333982e-255	5	KCNJ8
SEMA5B	6.35130727141052e-247	0.48284665664317	0.849	0.366	1.27026145428211e-243	5	SEMA5B
PCDH1	4.95983150160243e-244	0.271374956275113	0.898	0.761	9.91966300320487e-241	5	PCDH1
MSX1	6.39508714565714e-240	0.539194232482304	0.932	0.7	1.27901742913143e-236	5	MSX1
ACKR3	2.72456033482211e-237	0.555866975017675	0.928	0.541	5.44912066964423e-234	5	ACKR3
AOC3	3.33652303212006e-234	0.681925066125521	0.894	0.594	6.67304606424011e-231	5	AOC3
HES4	5.30797451103825e-233	1.2311910580854	0.954	0.696	1.06159490220765e-229	5	HES4
RERGL	7.30402352144878e-233	0.55385322843867	0.796	0.244	1.46080470428976e-229	5	RERGL
BCAM	2.45841462883431e-232	1.06052882615577	0.874	0.376	4.91682925766862e-229	5	BCAM
MEF2C	1.53705523474215e-231	1.32664497753619	0.895	0.61	3.0741104694843e-228	5	MEF2C
FOXF1	1.56572339384506e-231	0.354330729976824	0.905	0.703	3.13144678769013e-228	5	FOXF1
CCDC102B	1.28072089285765e-229	0.929137068967437	0.931	0.837	2.56144178571531e-226	5	CCDC102B
HSPB1	3.62465030848583e-226	1.34743721520076	0.99	0.854	7.24930061697167e-223	5	HSPB1
ACTA2	4.34707973644173e-225	1.866943498171	0.985	0.868	8.69415947288347e-222	5	ACTA2
ADIRF	5.14128755842833e-225	1.65018535744766	0.966	0.859	1.02825751168567e-221	5	ADIRF
ADAMTS9	3.36474484428534e-224	0.305415666286489	0.86	0.282	6.72948968857068e-221	5	ADAMTS9
RCAN2	4.64595034337281e-223	0.966571548833729	0.883	0.532	9.29190068674562e-220	5	RCAN2
TINAGL1	1.45041670927523e-222	1.37634113608283	0.919	0.821	2.90083341855046e-219	5	TINAGL1
ABCC9	6.81077452955096e-221	0.931336800568979	0.871	0.488	1.36215490591019e-217	5	ABCC9
PDGFA	6.67576347101346e-220	0.940571241575198	0.922	0.756	1.33515269420269e-216	5	PDGFA
EPAS1	5.37931496637915e-219	1.14990919803424	0.925	0.63	1.07586299327583e-215	5	EPAS1
GUCY1B1	2.07765578513045e-216	0.792035803343865	0.95	0.703	4.1553115702609e-213	5	GUCY1B1
ADAMTS11	3.32504568897989e-215	1.1929631750814	0.95	0.524	6.65009137795978e-212	5	ADAMTS1
KCNE4	3.72503760156001e-214	1.10751249015863	0.959	0.846	7.45007520312002e-211	5	KCNE4
HIGD1B	1.60775841579148e-213	1.27934233477428	0.849	0.514	3.21551683158296e-210	5	HIGD1B
HES5	5.5622210533088e-213	0.363846127486744	0.84	0.517	1.11244421066176e-209	5	HES5
CITED4	9.8182100759739e-213	0.428772292016356	0.926	0.659	1.96364201519478e-209	5	CITED4
PPP1R14A	1.41570276003755e-212	1.22762138225266	0.92	0.747	2.83140552007511e-209	5	PPP1R14A
SPARCL1	2.91439583699641e-210	1.39618849407023	0.984	0.827	5.82879167399281e-207	5	SPARCL1
ARHGAP29	2.37258520013079e-209	0.971795553540711	0.957	0.836	4.74517040026157e-206	5	ARHGAP29
SLN1	4.80193387438738e-208	0.30202293239895	0.874	0.659	9.60386774877475e-205	5	SLN
MYL9	8.38284874160811e-207	1.18292174499731	0.984	0.803	1.67656974832162e-203	5	MYL9
GJA4	6.0655194429047e-206	1.1046018135107	0.833	0.337	1.21310388858094e-202	5	GJA4
SSTR2	2.10992463081849e-203	0.689242108882829	0.857	0.469	4.21984926163698e-200	5	SSTR2
RRAD1	1.8323868190809e-202	1.00944310550714	0.891	0.481	3.66477363816181e-199	5	RRAD
JAG11	1.05153249864488e-201	1.05624338736296	0.945	0.802	2.10306499728977e-198	5	JAG1
TPPP3	1.3827535916831e-199	0.953318917263793	0.903	0.667	2.76550718336619e-196	5	TPPP3
PGF1	5.16896991412394e-199	1.16545785093197	0.935	0.801	1.03379398282479e-195	5	PGF
COL4A2	1.1836168041987e-198	1.16954897867714	0.969	0.861	2.3672336083974e-195	5	COL4A2
GUCY1A2	2.97177309484674e-196	0.649695727540249	0.867	0.757	5.94354618969347e-193	5	GUCY1A2
AGT	3.11467208298898e-195	1.09863259432158	0.901	0.618	6.22934416597796e-192	5	AGT
EDNRA	5.65756531387678e-195	0.908133648518893	0.923	0.715	1.13151306277536e-191	5	EDNRA
NOTCH3	1.69033373943438e-185	0.997505776616448	0.91	0.724	3.38066747886876e-182	5	NOTCH3
TPM2	3.61508122129742e-184	1.08881322352811	0.988	0.823	7.23016244259484e-181	5	TPM2
FMO3	1.27162994819865e-183	0.379883198377647	0.908	0.528	2.54325989639731e-180	5	FMO3
NGF	1.203346761581e-182	0.357640919749977	0.871	0.567	2.406693523162e-179	5	NGF
LHFPL6	2.53722216486109e-182	0.935258922516591	0.965	0.83	5.07444432972217e-179	5	LHFPL6
IER51	1.01227530270417e-180	0.996621886401606	0.962	0.766	2.02455060540834e-177	5	IER5
MYLK	1.3031851469094e-180	1.09410531018809	0.929	0.751	2.60637029381881e-177	5	MYLK
SEPT41	1.25215171123573e-177	0.83107193300749	0.835	0.382	2.50430342247147e-174	5	SEPT4
TCIM	2.81629376941559e-177	0.471104071256346	0.932	0.85	5.63258753883119e-174	5	TCIM
ADAP2	1.41852624348666e-174	0.509999591162359	0.826	0.616	2.83705248697331e-171	5	ADAP2
ZFAND2A1	4.67428660557001e-174	0.716606792277347	0.957	0.874	9.34857321114002e-171	5	ZFAND2A
HSPA6	1.07806466477704e-169	1.57079637059986	0.951	0.845	2.15612932955408e-166	5	HSPA6
ID41	1.39782805855623e-169	0.798817544247633	0.959	0.686	2.79565611711247e-166	5	ID4
SOD3	2.17065578635665e-168	1.07515059670425	0.939	0.751	4.34131157271329e-165	5	SOD3
WFDC1	1.65632372038816e-165	0.633511123076228	0.845	0.65	3.31264744077633e-162	5	WFDC1
NRARP	3.23467991798755e-162	0.543388896871989	0.806	0.423	6.46935983597509e-159	5	NRARP
NRGN	1.25018394610355e-160	0.523993869885692	0.84	0.8	2.50036789220709e-157	5	NRGN
COL14A1	4.45563606719076e-160	0.862531303276866	0.92	0.742	8.91127213438152e-157	5	COL14A1
HEYL1	1.93040960971435e-155	0.526669178000888	0.911	0.808	3.86081921942871e-152	5	HEYL
CPE1	3.07348339695542e-154	0.952810133987925	0.904	0.742	6.14696679391083e-151	5	CPE
PDE3A	5.29907136444772e-148	0.460506478183072	0.883	0.733	1.05981427288954e-144	5	PDE3A
CALD11	9.19880199057802e-146	0.662746565440522	0.985	0.859	1.8397603981156e-142	5	CALD1
C11orf961	3.42380232865788e-144	1.07701259442457	0.985	0.831	6.84760465731576e-141	5	C11orf96
CSRP21	5.00571025125478e-143	0.886796652638771	0.891	0.673	1.00114205025096e-139	5	CSRP2
NDUFA4L21	7.1213820614312e-141	0.913095893172215	0.973	0.884	1.42427641228624e-137	5	NDUFA4L2
RHOB	4.38878739351735e-139	0.978931446670835	0.963	0.755	8.77757478703471e-136	5	RHOB
SMOC2	7.07537603360976e-135	0.729987228356056	0.845	0.525	1.41507520672195e-131	5	SMOC2
LMOD1	4.16626697446609e-132	0.571197736079154	0.786	0.393	8.33253394893218e-129	5	LMOD1
HSPA1B1	1.36465184138749e-131	1.25603709697135	0.985	0.841	2.72930368277498e-128	5	HSPA1B
CRIP21	1.61950015799844e-131	0.787421876182289	0.907	0.759	3.23900031599689e-128	5	CRIP2
LIMS2	3.10012437276552e-128	0.252502076310152	0.798	0.474	6.20024874553105e-125	5	LIMS2
PCDH18	3.44338771572986e-125	0.253866276356636	0.882	0.559	6.88677543145971e-122	5	PCDH18
LINC00924	7.31364399733594e-125	0.286626642962643	0.829	0.364	1.46272879946719e-121	5	LINC00924
IER5L1	3.39375120325266e-124	0.8829602478316	0.963	0.812	6.78750240650532e-121	5	IER5L
LMCD1	1.42018714129942e-123	0.387788388224237	0.901	0.513	2.84037428259883e-120	5	LMCD1
CARMN	1.46407300456604e-123	0.894650594528124	0.814	0.649	2.92814600913209e-120	5	CARMN
COL4A11	7.72519479853867e-123	0.920486049942928	0.95	0.829	1.54503895970773e-119	5	COL4A1
PRSS231	1.37271858434424e-122	0.549904214283653	0.929	0.568	2.74543716868849e-119	5	PRSS23
DNAJA4	1.41998851661163e-122	0.342987474079248	0.917	0.719	2.83997703322325e-119	5	DNAJA4
CRIP1	1.28675593008864e-120	0.775992624784362	0.798	0.484	2.57351186017728e-117	5	CRIP1
FHL5	5.34399084913582e-120	0.613627849570365	0.755	0.526	1.06879816982716e-116	5	FHL5
KLHL23	8.88096947896137e-120	0.710804764872243	0.755	0.463	1.77619389579227e-116	5	KLHL23
MRVI1	2.70225874297091e-119	0.704470046295043	0.833	0.838	5.40451748594182e-116	5	MRVI1
CRYAB1	2.89992644153e-119	0.665150216212697	0.984	0.895	5.79985288306e-116	5	CRYAB
GPR4	2.00761558405154e-117	0.28804839126413	0.781	0.646	4.01523116810308e-114	5	GPR4
S100A4	1.32431996016246e-115	1.1945129064867	0.91	0.617	2.64863992032491e-112	5	S100A4
FBLIM1	5.43089546263228e-115	0.61913611898741	0.876	0.692	1.08617909252646e-111	5	FBLIM1
C1orf54	1.1357718709047e-112	0.456774060910864	0.935	0.698	2.2715437418094e-109	5	C1orf54
SEMA5A1	1.14247314038868e-112	0.499183772687593	0.814	0.715	2.28494628077735e-109	5	SEMA5A
HSPA1A	2.19387271985780e-112	1.28831464024997	0.985	0.913	4.38774543971559e-109	5	HSPA1A
DNAJB11	5.17349537046336e-112	0.943230865274985	0.978	0.851	1.03469907409267e-108	5	DNAJB1
RGS16	1.19526373563378e-111	0.879291569833337	0.898	0.719	2.39052747126757e-108	5	RGS16
FILIP1L	9.53912981275373e-110	0.743288781626739	0.873	0.707	1.90782596255075e-106	5	FILIP1L
ENPEP	6.53090242608304e-109	0.438256626158829	0.773	0.501	1.30618048521661e-105	5	ENPEP
PMEPA1	1.24394764059945e-108	0.691774348468863	0.842	0.655	2.48789528119891e-105	5	PMEPA1
EFHD1	1.86123341892506e-106	0.653871233326567	0.843	0.739	3.72246683785012e-103	5	EFHD1
HIC1	3.1961701893955e-106	0.335234305713125	0.922	0.616	6.39234037879101e-103	5	HIC1
SLIT3	2.8796295699093e-104	0.617651331934992	0.809	0.552	5.7592591398186e-101	5	SLIT3
PDLIM31	3.79047488095997e-104	0.707982644003696	0.978	0.855	7.58094976191994e-101	5	PDLIM3
ESAM	1.91652141424615e-96	0.657127646457911	0.718	0.276	3.8330428284923e-93	5	ESAM
IGFBP7	7.71306019049252e-95	0.498831348976435	1	0.953	1.5426120380985e-91	5	IGFBP7
ADGRF5	1.05697571223526e-94	0.693643864781171	0.777	0.72	2.11395142447052e-91	5	ADGRF5
CSPG4	1.73635362529696e-93	0.582197408552743	0.812	0.732	3.47270725059392e-90	5	CSPG4
LGI4	1.91052462006328e-92	0.717479519974073	0.725	0.504	3.82104924012656e-89	5	LGI4
MGLL1	2.83058029415953e-91	0.370570472496032	0.786	0.455	5.66116058831906e-88	5	MGLL
FOXS11	5.36506283752055e-91	0.307083924793902	0.948	0.808	1.07301256750411e-87	5	FOXS1
FOXC21	7.42783373634014e-91	0.558872771921314	0.911	0.726	1.48556674726803e-87	5	FOXC2
ID31	8.48886542452025e-91	0.822037956674133	0.973	0.872	1.69777308490405e-87	5	ID3
NFASC	3.68536742025243e-90	0.460519019094846	0.773	0.555	7.37073484050486e-87	5	NFASC
FILIP1	3.08164741286919e-89	0.685577052027389	0.71	0.257	6.16329482573839e-86	5	FILIP1
PLS3	1.27036218917169e-88	0.563390494323101	0.903	0.767	2.54072437834337e-85	5	PLS3
EMP2	1.78454493557565e-88	0.485151088224545	0.897	0.718	3.56908987115129e-85	5	EMP2
FRZB1	2.33149023183659e-87	0.509924451250643	0.876	0.781	4.66298046367318e-84	5	FRZB
TENT5A1	9.05557531769529e-84	0.560996328369788	0.942	0.813	1.81111506353906e-80	5	TENT5A
MAP1B1	6.28897294809708e-82	0.480275699656959	0.954	0.778	1.25779458961942e-78	5	MAP1B
TAGLN1	7.97366240327798e-81	0.789416035841782	0.972	0.915	1.5947324806556e-77	5	TAGLN
PLXDC1	2.19080997388111e-80	0.680959470255257	0.846	0.834	4.38161994776221e-77	5	PLXDC1
S1PR31	4.66667625471249e-80	0.553457535029226	0.817	0.642	9.33335250942498e-77	5	S1PR3
MMP11	1.12251002869909e-79	0.39623626760832	0.9	0.736	2.24502005739818e-76	5	MMP11
BAG31	7.07747070312401e-79	0.378615484286749	0.916	0.694	1.4154941406248e-75	5	BAG3
DEPP1	1.23130844486925e-78	0.435289713490976	0.944	0.726	2.46261688973851e-75	5	DEPP1
KLF9	2.53526357822867e-77	0.54018790470536	0.866	0.713	5.07052715645734e-74	5	KLF9
THY1	3.29722420550546e-77	0.937462299770149	0.907	0.703	6.59444841101092e-74	5	THY1
PDGFRB	8.4142134134468e-77	0.565244795400584	0.885	0.79	1.68284268268936e-73	5	PDGFRB
HSPH12	2.50102646831195e-76	0.582230043257932	0.957	0.822	5.0020529366239e-73	5	HSPH1
NR2F21	1.24606154714254e-73	0.476258017843008	0.981	0.852	2.49212309428507e-70	5	NR2F2
PLAC91	5.86239586268875e-72	0.536217685776874	0.925	0.845	1.17247917253775e-68	5	PLAC9
TMEM47	3.9047428007933e-71	0.446426823805677	0.851	0.733	7.80948560158661e-68	5	TMEM47
RASL12	6.47935359390728e-71	0.540332614544875	0.761	0.679	1.29587071878146e-67	5	RASL12
ATF31	7.31881513957992e-71	0.711871030779539	0.898	0.725	1.46376302791598e-67	5	ATF3
ASPN	4.31321484229087e-70	0.504844579475986	0.947	0.75	8.62642968458174e-67	5	ASPN
FAM162B	7.5225633824897e-70	0.5091205807827	0.679	0.303	1.50451267649794e-66	5	FAM162B
A2M	4.07790074700633e-69	0.406596027405201	0.954	0.89	8.15580149401265e-66	5	A2M
ADAMTS4	1.98646135260229e-68	0.491372734987231	0.688	0.339	3.97292270520459e-65	5	ADAMTS4
GUCY1A11	2.21717946581051e-66	0.524226040525315	0.839	0.751	4.43435893162102e-63	5	GUCY1A1
EBF1	3.63671177796291e-66	0.508770375469846	0.771	0.648	7.27342355592581e-63	5	EBF1
NFIB	6.41949008971412e-65	0.282324193041773	0.9	0.699	1.28389801794282e-61	5	NFIB
DUSP5	2.07990803543262e-64	0.378219381834914	0.891	0.654	4.15981607086524e-61	5	DUSP5
ITGA7	9.48630445433756e-64	0.620442844895858	0.675	0.371	1.89726089086751e-60	5	ITGA7
FOXC1	9.33330393071043e-62	0.493767382079487	0.903	0.817	1.86666078614209e-58	5	FOXC1
CAMK2N1	1.18454467527601e-61	0.498786779419871	0.863	0.78	2.36908935055202e-58	5	CAMK2N1
PHLDA2	6.36497515228348e-61	0.370478763583166	0.901	0.736	1.2729950304567e-57	5	PHLDA2
FXYD6	1.38663398925149e-59	0.406876440891352	0.799	0.626	2.77326797850298e-56	5	FXYD6
OR51E1	1.95347291415702e-59	0.366952170271853	0.623	0.168	3.90694582831404e-56	5	OR51E1
TSC22D11	9.41123069312014e-59	0.493293297398989	0.947	0.824	1.88224613862403e-55	5	TSC22D1
BTG21	1.29848899241139e-58	0.434836385302567	0.846	0.647	2.59697798482277e-55	5	BTG2
SOCS31	1.40163198177081e-58	0.486977954272193	0.857	0.611	2.80326396354163e-55	5	SOCS3
SPARC1	1.4782772105952e-58	0.387477919240569	0.976	0.902	2.95655442119039e-55	5	SPARC
DDIT4	2.14052215248547e-57	0.298821127723089	0.951	0.771	4.28104430497093e-54	5	DDIT4
SDC21	1.70113031280548e-55	0.317847321130985	0.925	0.803	3.40226062561097e-52	5	SDC2
PALLD	1.36858990975712e-54	0.484805530584517	0.883	0.81	2.73717981951423e-51	5	PALLD
ADGRA2	1.07740755409416e-53	0.449998351789215	0.808	0.74	2.15481510818831e-50	5	ADGRA2
DMD	2.76376000447216e-51	0.32586637697803	0.728	0.558	5.52752000894433e-48	5	DMD
BGN1	3.3394672652717e-51	0.427328357758057	0.968	0.914	6.67893453054339e-48	5	BGN
CSRP1	6.70840136565515e-51	0.525318320521296	0.867	0.782	1.34168027313103e-47	5	CSRP1
ETS1	7.03420022934029e-51	0.463094611374841	0.758	0.672	1.40684004586806e-47	5	ETS1
LRRC32	8.93918837516235e-50	0.343743433125399	0.908	0.744	1.78783767503247e-46	5	LRRC32
KLF21	2.09183405789833e-46	0.37929621717761	0.923	0.752	4.18366811579665e-43	5	KLF2
ECE1	2.90819488626749e-45	0.309719420032957	0.795	0.687	5.81638977253498e-42	5	ECE1
TFPI	1.13118052474312e-44	0.356336158428231	0.907	0.681	2.26236104948624e-41	5	TFPI
MYC	4.01757134419738e-44	0.492423566058685	0.773	0.611	8.03514268839476e-41	5	MYC
FAM129A	1.45701605165224e-42	0.423892029253666	0.641	0.482	2.91403210330449e-39	5	FAM129A
GEM1	2.03493858680936e-42	0.389258138798706	0.947	0.817	4.06987717361872e-39	5	GEM
CNN1	4.10521350321614e-42	0.614001470499918	0.789	0.781	8.21042700643228e-39	5	CNN1
SLC2A3	1.06438746609721e-41	0.314379845365284	0.908	0.758	2.12877493219441e-38	5	SLC2A3
COX4I2	2.54234839094248e-40	0.673330119546011	0.628	0.39	5.08469678188497e-37	5	COX4I2
ID2	4.29385420776242e-40	0.30745296138458	0.92	0.826	8.58770841552483e-37	5	ID2
SERPINH11	1.46851691164356e-39	0.277482938982575	0.95	0.869	2.93703382328711e-36	5	SERPINH1
EDNRB1	6.94197171689532e-38	0.317177825125092	0.659	0.546	1.38839434337906e-34	5	EDNRB
GADD45B1	8.8036428786909e-38	0.474615251123858	0.922	0.786	1.76072857573818e-34	5	GADD45B
PRKG1	1.44937692142234e-37	0.464350635524154	0.653	0.547	2.89875384284467e-34	5	PRKG1
UBE2S	6.99255657347517e-37	0.358679481940801	0.898	0.757	1.39851131469503e-33	5	UBE2S
MTUS1	1.06913920062119e-35	0.299473139900463	0.919	0.803	2.13827840124238e-32	5	MTUS1
HSPB8	1.96571248661985e-35	0.26033370688249	0.86	0.738	3.93142497323969e-32	5	HSPB8
ACTN1	2.03831094041351e-35	0.361011386580107	0.895	0.83	4.07662188082701e-32	5	ACTN1
PDLIM71	7.44853473990212e-35	0.323525702655171	0.911	0.805	1.48970694798042e-31	5	PDLIM7
ARHGDIB	6.55375001160085e-34	0.461067039870797	0.75	0.728	1.31075000232017e-30	5	ARHGDIB
GJC1	9.16433257556634e-32	0.503446952993372	0.644	0.659	1.83286651511327e-28	5	GJC1
SYNPO2	4.45388178419603e-29	0.346213897424605	0.857	0.832	8.90776356839206e-26	5	SYNPO2
ATP1A2	2.36430822348471e-27	0.376411900456632	0.601	0.446	4.72861644696943e-24	5	ATP1A2
SYNM	3.78691786043885e-24	0.293191186363282	0.705	0.687	7.57383572087769e-21	5	SYNM
CCDC3	2.60234148618495e-23	0.330140281347991	0.632	0.473	5.20468297236991e-20	5	CCDC3
FBXO32	1.55804143087793e-22	0.255292292933793	0.845	0.74	3.11608286175587e-19	5	FBXO32
PDK4	2.50088148858028e-22	0.349424528241239	0.647	0.542	5.00176297716057e-19	5	PDK4
NEURL1B	5.5048522523826e-20	0.455299234342149	0.592	0.582	1.10097045047652e-16	5	NEURL1B
CD36	3.24608715172319e-18	0.575566160669726	0.567	0.348	6.49217430344637e-15	5	CD36
PLXND1	5.0679166446873e-18	0.28795644683908	0.594	0.451	1.01358332893746e-14	5	PLXND1
NEXN	5.67629552583281e-16	0.329782131872514	0.634	0.638	1.13525910516656e-12	5	NEXN
MAP3K7CL	9.52679443527479e-16	0.504442606987969	0.638	0.744	1.90535888705496e-12	5	MAP3K7CL
CCL19	9.09663174907341e-15	0.385173833726955	0.57	0.567	1.81932634981468e-11	5	CCL19
RERG	2.60895048072122e-12	0.322519541283358	0.572	0.468	5.21790096144243e-09	5	RERG
MTHFD2	2.87226357004571e-12	0.345176416746228	0.589	0.469	5.74452714009142e-09	5	MTHFD2
FABP4	5.27297292792678e-12	0.282603058300445	0.399	0.559	1.05459458558536e-08	5	FABP4
APOLD1	2.57715282021487e-11	0.399918998521456	0.545	0.245	5.15430564042973e-08	5	APOLD1
IFITM1	3.1201548924276e-11	0.258279041660976	0.681	0.68	6.2403097848552e-08	5	IFITM1
ANO1	4.94292045773321e-09	0.331315256861996	0.674	0.839	9.88584091546643e-06	5	ANO1
SLC7A2	4.68222864259769e-06	0.330271575431236	0.614	0.728	0.00936445728519539	5	SLC7A2
